1                    **Intranasal gene therapy to prevent infection by SARS-CoV-2 variants**

2                    **Short title: Gene Therapy to Prevent COVID-19**

3                    Joshua J. Sims, Jenny A. Greig, Kristofer T. Michalson, Sharon Lian, R. Alexander Martino,  
4                    Rosemary Meggersee, Kevin B. Turner, Kalyani Nambiar, Cecilia Dyer, Christian Hinderer,  
5                    Makoto Horiuchi, Hanying Yan, Xin Huang, Shu-Jen Chen, James M. Wilson\*

6

7                    Gene Therapy Program, Department of Medicine, Perelman School of Medicine, University of  
8                    Pennsylvania, Philadelphia, PA 19104, USA

9                    \*Corresponding author:

10                   James M. Wilson, MD, PhD

11                   Gene Therapy Program

12                   Perelman School of Medicine

13                   University of Pennsylvania

14                   125 South 31<sup>st</sup> Street, Suite 1200

15                   Philadelphia, PA 19104, USA

16                   Phone: 215-573-9020; Fax: 215-494-5444

17                   E-mail: [wilsonjm@upenn.edu](mailto:wilsonjm@upenn.edu)

18

19

20 **Abstract**

21 SARS-CoV-2 variants have emerged with enhanced pathogenicity and transmissibility, and  
22 escape from pre-existing immunity, suggesting first-generation vaccines and monoclonal  
23 antibodies may now be less effective. This manuscript demonstrates an approach for preventing  
24 clinical sequelae and the spread of SARS-CoV-2 variants. First, we affinity-matured an  
25 angiotensin-converting enzyme 2 (ACE2) decoy protein, achieving 1000-fold binding  
26 improvements that extend across a wide range of SARS-CoV-2 variants and distantly related,  
27 ACE2-dependent coronaviruses. Next, we demonstrated the expression of this decoy in proximal  
28 airway when delivered via intranasal administration of an AAV vector. This intervention  
29 significantly diminished clinical and pathologic consequences of SARS-CoV-2 challenge in a  
30 mouse model and achieved therapeutic levels of decoy expression at the surface of proximal  
31 airways when delivered intranasally to nonhuman primates. Importantly, this long-lasting,  
32 passive protection approach is applicable in vulnerable populations such as the elderly and  
33 immune-compromised that do not respond well to traditional vaccination. This approach could  
34 be useful in combating COVID-19 surges caused by SARS-CoV-2 variants and should be  
35 considered as a countermeasure to future pandemics caused by pre-emergent members, ACE2-  
36 dependent CoVs that are poised for zoonosis.

37

38

39

40

41

42 **Author summary**

43 SARS-CoV-2 variants have emerged with enhanced pathogenicity and transmissibility, and  
44 escape from pre-existing immunity, suggesting first-generation vaccines and monoclonal  
45 antibodies may now be less effective. This manuscript demonstrates an approach for preventing  
46 clinical sequelae and the spread of SARS-CoV-2 variants. First, we affinity-matured an  
47 angiotensin-converting enzyme 2 (ACE2) decoy protein, achieving 1000-fold binding  
48 improvements that extend across a wide range of SARS-CoV-2 variants and distantly related,  
49 ACE2-dependent coronaviruses. Next, we demonstrated the expression of this decoy in proximal  
50 airway when delivered via intranasal administration of an AAV vector. This intervention  
51 significantly diminished clinical and pathologic consequences of SARS-CoV-2 challenge in a  
52 mouse model and achieved therapeutic levels of decoy expression at the surface of proximal  
53 airways when delivered intranasally to nonhuman primates. Importantly, this long-lasting,  
54 passive protection approach is applicable in vulnerable populations such as the elderly and  
55 immune-compromised that do not respond well to traditional vaccination. This approach could  
56 be useful in combating COVID-19 surges caused by SARS-CoV-2 variants and should be  
57 considered as a countermeasure to future pandemics caused by pre-emergent members, ACE2-  
58 dependent CoVs that are poised for zoonosis.

59

60

61

62

63

## 64 **Introduction**

65 Developing a soluble form of angiotensin-converting enzyme 2 (ACE2)—referred to as a  
66 decoy—is considered a protein therapeutic in the treatment of COVID-19 patients (1, 2). We  
67 isolated an ACE2 decoy that broadly neutralizes SARS-CoV-2 variants and demonstrate its  
68 potential for preventing COVID-19 when expressed from an adeno-associated virus (AAV)  
69 following intranasal (IN) delivery. We have reported previously on the effectiveness of IN AAV  
70 to express antibodies that broadly neutralize pandemic strains of influenza (3-6).

## 71 **Results**

### 72 **ACE2 decoy affinity maturation enhances neutralization of SARS-CoV-2 100-fold**

73 We initially constructed a decoy receptor by fusing a human ACE2 fragment to the human IgG4  
74 Fc domain. We cloned this first-generation decoy into AAV and delivered it as a nasal spray into  
75 nonhuman primates (NHPs). Although we detected decoy expression in nasal lavage fluid  
76 (NLF), the decoy was not produced at levels sufficient to overcome the low neutralizing potency  
77 of this protein (Figure S1). We therefore set out to affinity-mature the ACE2 protein sequence.

78

79 We generated diverse ( $>10^8$  transformants) ACE2 variant libraries in a yeast-display format(7)  
80 using error-prone polymerase chain reaction (PCR; Figure 1A and Figure S2). We screened the  
81 primary libraries in rounds of fluorescence-activated cell sorting (FACS; Figure 1B). We  
82 selected populations with better binding to SARS-CoV-2 receptor binding domain (RBD) and  
83 tracked library convergence with deep sequencing (Figure 1C and 1D). Frequently observed  
84 mutations from our primary library sorts overlap partially with mutations reported by others(2,  
85 8), including substitutions at T27 and N90 glycan disruption (Figure S2). Validated clones from

86 the sorted primary libraries (Figure S3) seeded a secondary library formed by mutagenic  
87 recombination(9, 10), which we screened using stringent off-rate sorting(11) (Figure 1C).

88

89 We expressed ACE2 variants from several stages of the yeast-display screening as soluble IgG4  
90 Fc fusions, evaluated expression titers, and predicted IC<sub>50</sub> for SARS-CoV-2 neutralization using  
91 reporter virus (Figure S3). The most potent neutralizing variants converged upon similar  
92 substitutions at five positions: 31, 35, 79, 330, and N90 glycan disruption (Figure 1E). After  
93 further characterization, we selected CDY14-Fc4 as the most improved ACE2 decoy variant. To  
94 avoid off-target effects *in vivo*, we ablated ACE2 enzyme activity by introducing H345L(12) at  
95 no cost to potency. By surface plasmon resonance (SPR) the active site-null CDY14HL-Fc4  
96 bound SARS-CoV-2 RBD with 1,000-fold improved affinity (29 nM for wtACE2 vs. 31 pM for  
97 CDY14HL-Fc4; see Figure 1, panels F and G). CDY14HL-Fc4 neutralized Wuhan-Hu-1 SARS-  
98 CoV-2 reporter nearly 100-fold better than the un-engineered ACE2 decoy (IC<sub>50</sub> 127 ng/ml for  
99 CDY14HL-Fc4 vs. 11 µg/ml for ACE2-wt-Fc4; see Figure 1H).

100

### 101 **ACE2 decoy is effective against SARS-CoV-2 variants and SARS-CoV-1**

102 Escape mutations at the immunodominant ACE2 binding site of the RBD is of major concern for  
103 emerging SARS-CoV-2 variants(13). RBDs from more distant ACE2-dependent CoVs also  
104 differ substantially from the original SARS-CoV-2 at the ACE2 interface (Figure 2A). Unlike  
105 antibodies, decoy inhibitors may achieve broad neutralization and escape mutant resistance;  
106 changes that reduce decoy binding would also decrease ACE2 receptor binding, thus reducing  
107 viral fitness. To assess this potential, we measured ACE2-Fc4 (a surrogate for the native

108 receptor) and CDY14HL-Fc4 (the therapeutic decoy) affinities across a diverse panel of CoV  
109 RBDs using SPR. We chose RBDs from strains under positive selection in the course of the 2020  
110 pandemic (e.g., 439K (14), B.1.1.7 and B.1.351, first isolated in the EU, UK, and the Republic of  
111 South Africa, respectively(15)), and mink-adapted isolates(16). Several emerging SARS-CoV-2  
112 variants with improved affinity for ACE2-Fc4 (B.1.1.7, 453F, and 501T) also bind CDY14HL-  
113 Fc4 more tightly (Figure 2B and Figure S4), while B.1.351, 439K, and 439K/417V only  
114 modestly alter binding to ACE2-Fc4 or CDY14HL-Fc4. While 486L reduces affinity for  
115 CDY14HL-Fc4, it does so for ACE2-Fc4 proportionally. Remarkably, decoy and receptor RBD  
116 affinities are tightly coupled even for the distantly related SARS-pandemic CoV-1 and the pre-  
117 emergent bat WIV1-CoV(17).

118

119 Next, we compared decoy neutralization across diverse SARS-CoVs using pseudotyped  
120 lentivirus reporters. The SARS-CoV-2 variant reporter viruses in the 614G (18, 19) background  
121 (439K, B.1.1.7, B.1.351) are neutralized near or below the  $IC_{50}$  of the 614G reporter ( $IC_{50}$  values:  
122 77 ng/ml for 614G, 42 ng/ml for 439K, 93 ng/ml for B.1.1.7, and 45 for B.1.351; Figure 2C).  
123 Remarkably, selecting for increased binding to the SARS-CoV-2 RBD resulted in very potent  
124 neutralization of the phylogenetically distinct SARS-CoV-1 reporter virus ( $IC_{50} = 53$  ng/ml).  
125 Taken together with the binding survey, these data indicate that structural features of the ACE2  
126 interface have been retained through the stages of directed evolution. Moreover, the data predict  
127 that CDY14HL-Fc4 could protect against current, emerging, and future pandemic ACE2-  
128 dependent CoVs.

129

## 130 **ACE2 decoy diminishes SARS-CoV-2 sequelae in transgenic mice**

131 We considered SARS-CoV-2 challenge studies in hamsters, macaques, and the hACE2  
132 transgenic (TG) mice to evaluate the *in vivo* efficacy of an AAV vector expressing CDY14HL-  
133 Fc4. In all models, achieving evidence of viral replication *in vivo* requires virus doses that far  
134 exceed those required for human transmission. Furthermore, the clinical and pathologic sequelae  
135 of SARS-CoV-2 exposure is attenuated in these species compared to severely affected humans.  
136 The most significant limitation, however, is that all the challenge models require direct pathogen  
137 delivery to the lung in order to demonstrate pathology, which does not simulate the mechanism  
138 of the AAV decoy product, which focuses on localized expression in the proximal airway  
139 following intranasal delivery to reduce SARS-CoV-2 infection and its consequences. We  
140 therefore selected the hACE2 TG mouse model for three reasons: 1) we can characterize disease  
141 by measuring viral loads, clinical sequelae, and histopathology; 2) we can use an IN route of  
142 administration as we would in humans, realizing this deposits vector in the proximal and distal  
143 airways of the mouse, while IN delivery in humans is restricted to the proximal airway; and 3)  
144 we can leverage the extensive experience of murine models in de-risking human studies of AAV  
145 gene transfer.

146

147 We conducted pilot studies in wild-type mice to determine which decoy protein (CDY14-Fc4 vs.  
148 CDY14HL-Fc4) and capsid (clade F AAVhu68 vs. clade A AAVrh91) maximized expression  
149 following *in vivo* gene delivery. We administered  $10^{11}$  GC of vector and recovered broncho-  
150 alveolar lavage samples (BAL) 7 days later to evaluate ACE2 decoy protein expression and  
151 activity (Figure 3A-C). Based on mass spectrometry (MS) protein measurements, the AAVhu68

152 capsid was more efficient than the AAVrh91 capsid in transducing mouse lung. The HL  
153 mutation modestly reduced expression ( $p < 0.007$ ). Importantly, we found a direct correlation  
154 between decoy expression levels and the ability to bind to SARS-CoV-2 spike protein and  
155 neutralize a SARS-CoV-2 pseudotype, demonstrating function of the decoy expressed from  
156 airway tissues (Figure 3A-C). We selected CDY14HL-Fc4 as the clinical candidate transgene  
157 and the AAVhu68 capsid for the mouse challenge studies (Figure 3D).

158

159 We IN delivered AAVhu68-CDY14HL-Fc4 or vehicle to hACE2-TG mice. Seven days later,  
160 animals were challenged with SARS-CoV-2 (280 pfu), followed clinically (observation and daily  
161 weights), and necropsied on days 4 and 7 after challenge for tissue and BAL analysis (Figure  
162 3D). Expression of CDY14HL-Fc4 in BAL normalized for dilution was in the range of the  $IC_{50}$   
163 measured *in vitro* and in the pilot studies (Figure 3F). Sham-treated SARS-CoV-2 challenged  
164 animals demonstrated statistically significant weight loss as has been described by others(20-22).  
165 We observed significantly less weight loss amongst vector-treated animals (which we followed  
166 for 7 days) compared to untreated animals (observed on days 4 and 7;  $p < 0.05$ , linear mixed effect  
167 modeling). The vector-treated animals also significantly differed from the untreated,  
168 unchallenged animals (Figure 3E). Interestingly, the clinical outcome of the treatment was better  
169 among females than males, although we noted significant variations within the treated group  
170 (Figure S5).

171

172 Histopathology of the lungs from vehicle treated animals challenged with SARS-CoV-2 revealed  
173 findings similar to that previously described in this model(22). As expected, tissues from animals



174 not challenged with SARS-CoV-2 demonstrated no histopathology. Samples from days 4 and 7  
175 showed reduced lung pathology in AAVhu68.CDY14HL-Fc4 treated animals vs. the vehicle-  
176 treated animals; the day-4 samples achieved statistical significance ( $p < 0.05$ ; Wilcoxon Rank  
177 Sum Test). (Figure 3G). Compared to vehicle-treated animals, viral RNA in BAL and lung  
178 homogenate was diminished at day 4 and 7 in AAVhu68.CDY14HL-Fc4 treated animals (Figure  
179 3H and 3I). The greatest reductions were at day 7 for both BAL (26-fold) and lung tissue (35-  
180 fold). Impact of the AAVhu68.CDY14HL-Fc4 on SARS-CoV-2 replication, as determined by  
181 median sgRNA levels, was greatest at day 7 (27-fold reduction, Figure 3J). Although there was  
182 substantial inter-animal variation, 2/5 animals in the treated groups showed nearly complete  
183 abrogation of viral replication and little weight loss by day 7.

184

### 185 **AAV delivery yields therapeutic ACE2 decoy levels in nonhuman primates**

186 Next, we determined which AAV capsid is most efficient at transducing cells of the nonhuman  
187 primate (NHP) proximal airways—the desired cellular targets for COVID-19 prophylaxis  
188 following nasal delivery of vector. We administered vector using a previously approved  
189 intranasal mucosal atomization device (MAD Nasal™), which comprises an atomizing tip with a  
190 soft conical nostril seal fit on a standard syringe (Figure 4A). A mixture of 9 AAV serotypes  
191 with uniquely barcoded transgenes were administered via the MAD Nasal™ to an NHP. Tissues  
192 were harvested 14 days later for evaluation of relative transgene expression using the mRNA  
193 bar-coding technique (Figure 4B)(23). The novel Clade A capsid (AAVrh91) we isolated from  
194 macaque liver performed best in the nasopharynx and septum (Figure 4C and 4D) with low but  
195 detectable expression levels in large airways and distal lung (Figure S6A-G). Clade E and F  
196 capsids performed better than AAVrh91 in some non-target tissues such as distal lung (Figure

197 S6A-G). The profile of expression from AAVrh91 illustrates relative distribution of transgene  
198 expression with proximal airway structures>intra-pulmonary conducting airway>distal lung  
199 (Figure 4E).

200

201 To determine the candidate for clinical evaluation, we conducted a final NHP study where  
202 groups of 2 animals were administered  $5 \times 10^{12}$  GC of vectors that differed with respect to capsid  
203 (AAVhu68 vs. AAVrh91) and transgene cassettes (CDY14-Fc4 vs CDY14HL-Fc4). NLFs were  
204 harvested on days 7, 14, and 28, and animals were necropsied on day 28 for biodistribution.  
205 Analysis of pulmonary tissues from day 28 revealed broad distribution throughout the proximal  
206 and distal airway, with AAVrh91 demonstrating superior gene transfer to proximal airway  
207 structures, as suggested by the barcode study (Figure S6H-I). We estimated decoy protein  
208 concentrations in the air-surface liquid (ASF) based on dilution-adjusted MS measurements of  
209 NLF (Figure 4F). The effective concentrations at the ASF were in the range that demonstrated  
210 neutralization in the *in vitro* assay. Expression was slightly higher with AAVrh91 vs. AAVhu68,  
211 and CDY14HL-Fc4 vs. CDY14-Fc4. A subset of samples evaluated for binding to the spike  
212 protein of SARS-CoV-2 showed a good correlation with decoy protein as measured by MS. This  
213 indicates that the decoy protein produced *in vivo* in proximal airways is indeed functional (Figure  
214 4G).

215

216 Based on these data, we selected a candidate for subsequent clinical evaluation called GTP404.  
217 This candidate utilizes AAVrh91 as the capsid because of its transduction profile and  
218 CDY14HL-Fc4 as the transgene because it retained broad and potent neutralizing activity in the

219 setting of an ACE2-disabling mutation. In preparation for IND-enabling studies, we administered  
220 GTP404 at a 10-fold lower dose to two additional NHPs (Figure 4F). Impressive levels of decoy  
221 protein were present in nasal ASF with concentrations only slightly reduced in comparison to  
222 those achieved with the higher dose.

223

## 224 **Discussion**

225 The rapid emergence of more dangerous and transmissible variants of SARS-CoV-2 in this  
226 pandemic is troubling, but not unexpected. The immunological pressures on the virus during  
227 natural infections, following antibody therapies, and active vaccines have promoted the  
228 emergence of variants(24). It appears that SARS-CoV-2 improved fitness through mutations that  
229 both increased affinity for ACE2 and decreased neutralization by antibodies elicited to precursor  
230 strains of the virus(15, 25, 26). The density of ACE2 in the nose and airway has been linked to  
231 pathogenicity and transmissibility of SARS-CoV-2(27). The lower levels of ACE2 in the  
232 proximal airways of children may be responsible for the lower infection rates and milder  
233 symptoms in this group(28). It has been proposed that SARS-CoV-2 variants achieve greater  
234 infection and transmission through increased affinity(25, 29); here we confirm increased affinity  
235 for ACE2 in SARS-CoV-2 strains under positive selection during 2020.

236

237 Our original goal in engineering the ACE2 decoy was to improve its potency against SARS-  
238 CoV-2, which we accomplished through affinity maturation against the Wuhan-Hu-1 spike  
239 protein in a yeast display system. Our selection strategy yielded a decoy with high binding and  
240 neutralizing activity against a full range of SARS-CoV-2 variants, including B1.1.7 and B1.351,

241 which emerged from the UK and Republic of South Africa, respectively. However, we were  
242 surprised to see equally potent binding and neutralization against other betacoronaviruses,  
243 including SARS-CoV-1, which was responsible for the 2003 SARS pandemic. The presence of  
244 several second-shell mutations in the affinity-matured decoy may contribute to this breadth since  
245 the majority of the ACE2 contact surface was preserved (Figure S3). The engineered decoy may  
246 be the Achilles' heel of any ACE2-dependent CoV whose primary driver of fitness – higher  
247 binding to its receptor – should further enhance the potency of the ACE2 decoy.

248

249 We focused on IN delivery of AAV to express CDY14HL-Fc4 to prevent COVID-19. We used  
250 the previously described hACE2-TG mouse challenge model to demonstrate efficacy of the  
251 decoy *in vivo*. Treated animals lost less weight, showed reduced lung pathology, and showed less  
252 replication of the challenge virus. Our results are consistent with the use of this model to  
253 evaluate convalescent plasma(21), protease inhibitors(30), and monoclonal antibodies(31), where  
254 weight loss, pulmonary pathology, and viral load were decreased, but not completely  
255 abrogated.(21) We believe that the mouse challenge model underestimates the potential efficacy  
256 of IN AAV-CDY14HL-Fc4. The dose of SARS-CoV-2 that results in human infection is likely  
257 much lower, and therefore, easier to neutralize than the inoculating dose used in the mouse  
258 challenge model ( $2.5 \times 10^6$  particles or 280 PFU). We used a novel AAV Clade A capsid called  
259 AAVrh91 to maximize transduction in the proximal airways of NHPs. At a relatively low dose  
260 ( $5 \times 10^{11}$  GC), we achieved levels of CDY14HL-Fc4 in the ASF that should be sufficient to  
261 neutralize SARS-CoV-2 variants. Based on our previous studies—using AAV to deliver broadly  
262 neutralizing antibodies against influenza—we believe expression should be durable for at least  
263 six months and can be effectively readministered(3-6),(32).

264

265 The emergence of three lethal and highly contagious CoV outbreaks in two decades – SARS in  
266 2003, MERS in 2012, and COVID-19 in 2019 – suggests that CoVs will remain a threat to global  
267 health. Surveillance of potential zoonotic sources of these CoVs, such as bats, revealed reservoirs  
268 of related viruses capable of evolution and cross-species transmission(33). One possible  
269 therapeutic application of CDY14HL-Fc4 is in the prevention and treatment of future outbreaks  
270 caused by new CoVs that utilize ACE2 as a receptor. GTP404 could be rapidly deployed from  
271 stockpiles to contain the initial outbreak and the CDY14HL-Fc4 protein can be leveraged to  
272 improve outcomes in those who are infected. The CDY14HL-Fc4 products may be useful in the  
273 current COVID-19 pandemic if SARS-CoV-2 variants confound current treatment and  
274 prevention strategies. An immediate application could be in immune-suppressed individuals who  
275 do not respond to traditional vaccines, develop chronic infection with SARS-CoV-2, and may be  
276 reservoirs for new variants(24). The advantage of vector-expressed decoy in preventing COVID-  
277 19 infections in immune-suppressed individuals is that this therapy does not rely on the  
278 recipient’s adaptive immune system to be effective.

279

280

281

282

283

284

## 285 **Materials and Methods**

### 286 **Yeast display**

287 We generated mutagenized ACE2 gene fragments by error prone PCR using the Diversify PCR  
288 Random Mutagenesis Kit (TakaraBio) at multiple mutation levels, mixing the PCR products.  
289 We used Gap-repair cloning and high-efficiency LiAc transformation(34) to assemble the ACE2  
290 gene fragments into a centromeric plasmid. The plasmid contained an upstream Aga2 gene  
291 fragment, a downstream HA epitope tag with flexible GSG linkers, and was driven by an  
292 inducible GAL1 promoter, and contained a low-copy centromeric origin, similar to  
293 pTCON2(35). Following transformation or sorting rounds, we passaged the libraries at 10X  
294 diversity 3 times in SD-trp before inducing in log phase for 24 hrs at 30°C in SG-CAA(35). For  
295 FACS, we stained the yeast with recombinant CoV2 RBD-His6 (Genscript) at diminishing  
296 concentrations through the rounds (5nM, 1nM, 0.1nM +/- extended washes of up to 17 hrs for  
297 off-rate sorting). We followed up with Mouse anti His6 (Genscript), rabbit anti-HA-PE (Cell  
298 Signaling Technology), and goat anti mouse-488 secondary antibody (ThermoFisher) all in  
299 phosphate buffered saline (PBS) with 0.1% BSA. Libraries were sorted and analyzed for RBD  
300 binding and ACE2 expression at the Penn Flow Core on BD Influx and BD FACSAria II  
301 instruments. We extracted plasmid from clones or pools of clones using the Yeast Plasmid  
302 MiniPrep Kit (Zymo) and transformed this into bacteria for amplification.

303

### 304 **Next-Generation Sequencing and Analysis**

305 We performed 2x250 paired-end Illumina sequencing on randomly sheared and size-selected  
306 ACE2 amplicons from the yeast display rounds. After removing adapters and low-quality reads,

307 we mapped clean reads no shorter than 200bp to the WT ACE2 nucleotide sequences using  
308 NovoAlign (v.4.03.01). We translated in-frame sequences with mapping quality scores no lower  
309 than 30 and without indels into amino acid sequences and compared to the WT ACE2 protein  
310 sequence. We tallied non-synonymous changes for each codon across the ACE2 sequence (18-  
311 615). We calculated mutation rates at each codon as follows: (sum of non-synonymous  
312 AAs)/(sum of all AAs).

313

### 314 **Expression of ACE2 variant IgG Fc4 fusions and RBDs**

315 We sub-cloned candidate ACE2 synthetic DNA or decoy sequences from the yeast display  
316 format into pCDNA3.1, using the endogenous ACE2 signal peptide and appending a human  
317 IgG4 Fc domain (residues 99 to 327 from Uniprot reference sequence P01861) and a C-terminal  
318 His6 tag. To generate protein for screening we transiently transfected HEK293 cells with  
319 plasmid DNA in six-well plates using PEI and collected and clarified supernatant 72 hours later.  
320 We quantified expression using the IgG4 Human ELISA kit (Invitrogen BMS2095) with IgG4  
321 standards provided in the kit. For CDY14-Fc4 and CDY14HL-Fc4, we produced the protein in a  
322 similar manner but purified it on protein A sepharose followed by dialysis and SDS-Page  
323 analysis. We determined the concentration using the predicted extinction coefficient at 280nm.  
324 We cloned the synthetic sequences (IDT gBlocks) of RBD [Spike amino acids 330-530 (CoV2),  
325 317-516 (CoV1), and 318-517 (WIV1-CoV)] into pCDNA3.1 between an IL2 signal peptide plus  
326 Gly-Ser and a C-terminal His6 tag. We transfected RBD plasmids into HEK293 cells using PEI  
327 and collected supernatants 72 hrs later for clarification, concentration, and purification on Ni-  
328 NTA resin, followed by dialysis into PBS. We confirmed purity using Coomassie-stained SDS-

329 PAGE analysis. We determined concentrations of the RBD using predicted extinction  
330 coefficient at 280nm.

331

### 332 **RBD Binding with SPR**

333 We performed SPR binding analysis using a Biacore T200 instrument (GE Healthcare) at room  
334 temperature in HBS-EP(+) buffer (10 mM HEPES pH 7.4, 150 mM NaCl, 3 mM EDTA, and  
335 0.05% P20 surfactant, Cat# BR100669, Cytiva) using a protein A/G derivatized sensor chip  
336 (Cat# SCBS PAGHC30M, XanTec Bioanalytics). We injected WT ACE2-hFc4 or CDY14-hFc4  
337 diluted to 60nM in HBS-EP(+) at a flow rate of 10  $\mu$ L/min for 3 min to capture  $\sim$ 1,000 response  
338 units (RU) on the sensor surface in each cycle. We measured binding of various SARS-CoV  
339 RBD proteins to this surface at concentrations ranging from 200 nM to 0.195 nM. RBD binding  
340 was measured at a flow rate of 30  $\mu$ L/min, with a 3 min association time and a 15 min  
341 dissociation time. We performed regeneration between binding cycles using 10 mM glycine pH  
342 1.5 injected at a flow rate of 60  $\mu$ L/min for 1 min. KD values were determined for each  
343 interaction using kinetics parameter fitting in the Biacore T200 Evaluation software. We used a  
344 global 1:1 binding model and did not adjust for refractive index shift. Data presented are the  
345 average of two or more replicates were measured for each RBD domain tested.

346

### 347 **CoV Pseudotyped Lentiviral Neutralization Assay**

348 We obtained non-replicating lentivirus pseudotyped with CoV spike proteins from Integral  
349 Molecular. The reporter virus particles encoded a renilla luciferase reporter gene. We set up  
350 neutralization reactions with 100  $\mu$ l of inhibitor diluted in full serum media and 10  $\mu$ l of reporter



351 virus. After 1 hour at 37°C, we added 20,000 cells/well in 50 ul of a HEK 293T cell line  
352 overexpressing ACE2 (Integral Molecular) and incubated the cells for 48 hours. We measured  
353 reporter virus transduction activity on a luminometer (BioTek) using the Renilla Glo Kit  
354 (Promega) following manufacturer's instructions. For higher throughput screens of neutralizing  
355 potency, we used crude expression supernatant (described above) in the neutralization assay at 1  
356 or 2 dilutions (typically 10- or 100-fold). We transformed the luciferase reading to an estimated  
357 potency (EP) using the following formula:  $EP = (L * [decoy]) / (1 - L)$ , where L is the fractional  
358 luciferase level as compared to a mock sample (no inhibitor), and [decoy] is the concentration of  
359 the decoy in the neutralization well. This was sufficient to rank clones without performing a full  
360 titration.

361

## 362 **AAV Vector Production**

363 The University of Pennsylvania Vector Core produced recombinant AAV vectors as previously  
364 described (36, 37).

365

## 366 **Decoy Quantification by Mass Spectrometry**

### 367 *Standards*

368 Soluble hACE2Fc (produced in-house) was spiked at different levels (0.5-500 ng/mL) into PBS  
369 or NLF acquired from a naïve rhesus macaque. Samples were denatured and reduced at 90°C for  
370 10 minutes in the presence of 10mM dithiothreitol (DTT) and 2M Guanadinium-HCl (Gnd-HCl).  
371 We cooled the samples to room temperature, then alkylated samples with 30mM iodoacetamide

372 (IAM) at room temperature for 30 minutes in the dark. The alkylation reaction was quenched by  
373 adding 1 $\mu$ L DTT. We added 20mM ammonium bicarbonate to the denatured protein solution,  
374 pH 7.5-8 at a volume to dilute the final Gnd-HCl concentration to 200mM. Trypsin solution was  
375 added at ~4ng of trypsin per sample ratio and incubated at 37°C overnight. After digestion,  
376 formic acid was added to a final of 0.5% to quench digestion reaction.

### 377 *LC-MS/MS*

378 We performed online chromatography with an Acclaim PepMap column (15 cm long, 300- $\mu$ m  
379 inner diameter) and a Thermo UltiMate 3000 RSLC system (Thermo Fisher Scientific) coupled  
380 to a Q Exactive HF with a NanoFlex source (Thermo Fisher Scientific). During online analysis,  
381 the column temperature was regulated to a temperature of 35°C. Peptides were separated with a  
382 gradient of mobile phase A (MilliQ water with 0.1% formic acid) and mobile phase B  
383 (acetonitrile with 0.1% formic acid). We ran the gradient from 4% B to 6% B over 15 min, then  
384 to 10% B for 25 min (40 minutes total), then to 30% B for 46 min (86 minutes total). Samples  
385 were loaded directly to the column. The column size was 75 cm x 15  $\mu$ m I.D. and was packed  
386 with 2 micron C18 media (Acclaim PepMap). Due to the loading, lead-in, and washing steps, the  
387 total time for an LC-MS/MS run was about 2 hours.

388

389 We acquired MS data using a data-dependent top-20 method for the Q Exactive HF; we  
390 dynamically chose the most abundant not-yet-sequenced precursor ions from the survey scans  
391 (200–2000 m/z). Sequencing was performed via higher energy collisional dissociation  
392 fragmentation with a target value of 1e5 ions, determined with predictive automatic gain control.  
393 We performed an isolation of precursors with a window of 4 m/z. Survey scans were acquired at

394 a resolution of 120,000 at  $m/z$  200. Resolution for HCD spectra was set to 30,000 at  $m/z$ 200 with  
395 a maximum ion injection time of 50 ms and a normalized collision energy of 30. We set the S-  
396 lens RF level at 50, which gave optimal transmission of the  $m/z$  region occupied by the peptides  
397 from our digest. We excluded precursor ions with single, unassigned, or six and higher charge  
398 states from fragmentation selection.

### 399 ***Data processing***

400 We used BioPharma Finder 1.0 software (Thermo Fischer Scientific) to analyze all data. For  
401 peptide mapping, we used a single-entry protein FASTA database to perform searches. The mass  
402 area of the target peptide was plotted against the spike concentration to complete a standard  
403 curve.

### 404 ***Selection of target peptide***

405 Based on initial *in silico* studies, we selected four peptides as possible sequence-specific matches  
406 for targeted quantification. We evaluated sensitivity performance for quantification of the four  
407 peptide targets in the NLF background matrix. Following blank injections to establish system  
408 cleanliness, replicate injections (n = 3) were made at all levels, from 0.5 ng/mL to 500 ng/mL.  
409 Three of the peptides were detected with ANHYEDYGDYWR providing the greatest response  
410 across the whole range. We determined retention time (RT) reproducibility across all samples (n  
411 = 24) and determined peak area reproducibility and quantification accuracy for each level.  
412 Excellent linearity was observed for the levels tested with typical  $R^2 > 0.94$  for  
413 ANHYEDYGDYWR. For ANHYEDYGDYWR, we observed excellent precision and accuracy  
414 at all levels, with all replicates within 10% CV. For test articles, 1x or 10x NLF and/or  
415 bronchoalveolar lavage fluid (BAL) is treated as previously described without any dilution or

416 protein precipitation. The mass area of target peptide in test articles was compared to the linear  
417 calibration generated for the spiked material to determine the level of decoy present in the test  
418 article.

419

#### 420 **ASF dilutions from serum and lavage urea**

421 We used the urea concentrations in BAL or NLF and in serum collected at the same time to  
422 determine the dilution that the lavage introduced to the ASF(38). We quantified urea in mouse  
423 BAL and serum, and in NHP NLF using the Urea Assay Kit (Abcam). We obtained serum urea  
424 concentrations from NHP from the blood urea nitrogen as part of standard bloodwork lab panels  
425 (Antech).

426

#### 427 **Spike Binding ELISA**

428 SARS-CoV-2 Spike Protein RBD (Sinobio #40592-V08H) was immobilized on a 96-well plate  
429 (0.25ug/mL in PBS, 100ul/well) at 4°C overnight. Plates were then washed 5x with PBS/0.05%  
430 Tween and blocked with PBS/1.0% BSA for 1 hour with shaking. Samples (2x dilution in  
431 PBS/2.0% BSA) and standards (soluble hACE2-Fc at starting concentration 100ng/ml, 12-point,  
432 1:2 serial dilution, plus a 0.0ng/ml blank, in PBS/1.0% BSA) were added at 100ul/well in  
433 duplicate and incubated for 2 hours at room temperature with shaking. Wells were washed as  
434 described and biotin conjugated goat anti-human IgG (Jackson AffiniPure #109-065-098;  
435 1:30,000 or Southern Biotech 2049-08; 1:1,000) in PBS/1.0% BSA detection antibody was  
436 added to the wells at 100ul/well and incubated for 2 hours at room temperature with shaking.  
437 Wells were washed as described, followed by the addition of 100ul/well Streptavidin-HRP

438 (Abcam #ab7403; 1:30,000) in PBS/1.0% BSA for 30 minutes with shaking. Wells were washed  
439 as described and incubated in 100ul/well TMB substrate (Seracare #5120-0076) in the dark at  
440 room temperature with shaking until reaction was stopped with 100ul/well TMB Stop Solution  
441 (Seracare #5150-0021). Absorbances were read at 450 nm using a Spectramax M3 plate reader.  
442 We exported and analyzed the data in GraphPad Prism Version 9.0.2. All raw data was blank  
443 subtracted. We plotted a standard curve of soluble hACE2-Fc, and the X-axis (concentration)  
444 was  $\log_{10}$  transformed. We performed a 4-parameter nonlinear regression upon the transformed  
445 standard curve, and interpolated sample concentrations.

446

#### 447 **Determination of Matrix Interference in BAL and NLF Samples**

448 Soluble hACE2Fc was spiked into NLF (0.0, 0.5, 2.0, and 10.0 ng/ml) acquired from a naïve  
449 rhesus macaque on the same plate with a standard curve (soluble hACE2Fc starting  
450 concentration 100ng/ml, 12-point, 1:2 serial dilution, plus a 0.0ng/ml blank) in PBS/1.0% BSA.  
451 We performed the spike binding assay and data analysis as described above.

452

#### 453 **Expression study in mice**

454 All animal procedures were performed in accordance with protocols approved by the Institutional  
455 Animal Care and Use Committee of the University of Pennsylvania. C57BL/6J mice were  
456 purchased from The Jackson Laboratory. Anesthetized mice received an IN administration of  $10^{11}$   
457 GC of AAVhu68.CDY14-Fc4, AAVrh91.CDY14-Fc4, AAVhu68.CDY14HL-Fc4, or  
458 AAVrh91.CDY14HL-Fc in a volume of 50  $\mu$ L or the same volume of vehicle control (PBS) on

459 day 0. On day 7, mice were euthanized and BAL was collected (1 ml of PBS administered  
460 intratracheally).

461

### 462 **hACE2 TG Mouse Study**

463 To evaluate the prophylactic efficacy potential of AAV expressing hACE2 receptor decoys  
464 against SARS-CoV-2, BIOQUAL, Inc. (Rockville, MD) conducted a challenge study using  
465 hACE2 TG mice (Stock No: 034860, The Jackson Laboratory). Mice were administered with  
466 either vehicle or  $10^{11}$  GC of AAVhu68.CDY14HL-Fc4 IN on day -7 as described above. On day  
467 0, mice were administered with mock or the SARS-CoV-2 challenge (50  $\mu$ l of  $2.8 \times 10^2$  pfu of  
468 SARS-CoV-2, USA\_WA1/2020 isolate [NR-52281, BEI Resources]). Mice were euthanized on  
469 either day 4 or 7 via cervical dislocation. BAL was collected as described above and aliquoted  
470 for viral load assays into Trizol LS (Thermo Fisher Scientific, Waltham, MA) or heat inactivated  
471 (60°C for 30 minutes) for decoy protein expression. The lung was collected and split for  
472 histopathology into 10% neutral buffered formalin or snap frozen for viral load analysis. RNA  
473 extraction for RT-qPCR, the quantitative RT-PCR assay for SARS-CoV-2 RNA, and  
474 subgenomic RNA were performed as described(39).

475

### 476 **Histopathology of Collected Organs**

477 The organs collected at necropsy were trimmed and routinely processed for hematoxylin and  
478 eosin (H&E) staining. Slides were blindly evaluated by a blinded pathologist using a severity  
479 score of 0 (no lesions observed), 1 (minimal), 2 (mild), 3 (moderate), 4 (marked) and 5 (severe)  
480 for each finding.

481

## 482 **Intranasal capsid comparison by AAV barcoding**

483 We generated a set of custom barcoded plasmids using degenerate nucleotides that anneal  
484 immediately downstream of the stop codon in a GFP reporter construct that contains the AAV2  
485 ITRs. We produced barcoded AAV vectors for each serotype in the study separately by  
486 transfecting HEK293 cells as described(36), replacing the typical single ITR-containing plasmid  
487 in the transfection mix with an equimolar mixture of 4 uniquely barcoded reporter constructs.  
488 We pooled the individual vector preps on an equimolar basis using their digital droplet PCR  
489 titers. We determined the absolute barcode distribution in the AAV pool by deep sequencing; we  
490 extracted AAV genomes from the pool and performed linear-range PCR using primers that flank  
491 the barcode region to generate an amplicon for paired-end Illumina sequencing.

492

## 493 **NHP studies**

494 Rhesus and cynomolgus macaques were obtained from Primgen (PreLabs). NHP studies were  
495 conducted at the University of Pennsylvania or Children's Hospital of Philadelphia within  
496 facilities that are United States Department of Agriculture-registered, Association for  
497 Assessment and Accreditation of Laboratory Animal Care-accredited, and Public Health Service-  
498 assured. For the barcode study,  $4 \times 10^{12}$  GC of the pool AAV preps was delivered IN in a total  
499 volume of 0.28 ml to an adult male rhesus macaque using the MAD Nasal™ device. After 14  
500 days, we collected airway tissues at necropsy, and extracted total RNA using Trizol Reagent  
501 (Thermo Fisher). We generated cDNAs using Superscript III reverse transcriptase  
502 (ThermoFisher) and an oligo dT primer. We used the cDNAs to prepare barcode amplicons for

503 Illumina sequencing as described above. We extracted the relative barcode abundances in input  
504 (AAV mixture) and output (tissue cDNAs) from Illumina data. The ratio of output to input  
505 relative abundances for each barcode in each tissue is proportional to the relative efficiency of  
506 the capsid linked to that barcode in that tissue. Agreement among the 4 barcodes assigned to  
507 each capsid allows us to assess assay noise, and detect rare, tissue-specific effects of the barcode  
508 itself on transcript stability (none detected). For each tissue, we quantified the total capsid-  
509 derived transcript per ug of total RNA using qPCR with a primer/probe set common to all the  
510 barcoded reporters.

511

512 For the decoy expression in NHPs, cynomolgus macaques (n=2/vector) were administered IN  
513 with  $5 \times 10^{12}$  GC of AAVhu68.CDY14, AAVrh91.CDY14, AAVhu68.CDY14HL, or  
514 AAVrh91.CDY14HL as described above. An additional two NHPs were administered with  
515  $5 \times 10^{11}$  GC of AAVrh91.CDY14HL. All NHPs were negative for pre-existing neutralizing  
516 antibody titres to the administered AAV capsid prior to study initiation (Immunology Core at the  
517 Gene Therapy Program). Animals were monitored throughout the in-life phase for complete  
518 blood counts, clinical chemistries, and coagulation panels by Antech Diagnostics (Lake Success,  
519 NY). On days 7, 14, and 28 NLF was collected (animals placed in ventral recumbency with head  
520 tilted to the right, up to 5 mL of PBS delivered in 1mL aliquots, and fluid collected via gravity).  
521 Animals were necropsied on day 28 and a full histopathological evaluation was performed.

522

523 **Ethics Statement for Study Conducted at BIOQUAL (hACE2 TG Mouse Challenge Study)**



524 This research was conducted under BIOQUAL Institute Institutional Animal Care and Use  
525 Committee (IACUC) approved protocol number 21-005, in compliance with the Animal Welfare  
526 Act and other federal statutes, and regulations relating to animals and experiments involving  
527 animals. BIOQUAL is accredited by the Association for Assessment and Accreditation of  
528 Laboratory Animal Care International and adheres to principles stated in the Guide for the Care  
529 and Use of Laboratory Animals, National Research Council. Animals were monitored twice  
530 daily for clinical signs (specifically ruffled fur, heavy breathing, lethargy) and weighed daily.

### 531 **Statistical analysis**

532 Statistical analyses performed using *R* (version 4.0.0). Statistical tests described in figure  
533 legends.

534

535

536

537

538

539

540

541

542

543

544 **Acknowledgments**

545 We thank Hailey Shankle, Henry Hoff, Shiva Shrestha for notable contributions to the decoy  
546 development and characterization. We thank Nathan Denton for assistance with manuscript  
547 preparation and graphics. We thank Kirsten Copren and Maggie Shaw for sequencing and  
548 analysis support. We thank Victoria Kehm for histology processing and James Tarrant for  
549 histopathology analysis. We thank the Immunology Core and the Program for Comparative  
550 Medicine of the Gene Therapy Program at the University of Pennsylvania for study support. We  
551 thank the Flow Cytometry and Cell Sorting Resource Laboratory at the University of  
552 Pennsylvania for cell sorting. All vectors were produced by the Penn Vector Core.

553

554 **Funding**

555 This work was funded by the Harrington Discovery Institute, the NHLBI Gene Therapy  
556 Resource Program (75N92019D00016), and internal Gene Therapy Program resources.

557

558 **Author Contributions**

559 J.J.S. – conceptualization, investigation, methodology, project administration, writing-original  
560 draft, writing-review and editing; J.A.G. – formal analysis, methodology, project administration,  
561 writing-review and editing; K.T.M. – methodology, resources, writing-original draft, writing-  
562 review and editing; S.L. – investigation; R.A.M. – investigation; R.M. – investigation; K.B.T. –  
563 investigation, methodology; K.N. – resources; C.D. – methodology, resources; C.H. –  
564 conceptualization, methodology; M.H. investigation; H.Y. – formal analysis; X.H. – formal

565 analysis, software; S.J.C. – investigation; J.M.W. – conceptualization, funding acquisition,  
566 methodology, supervision, writing-original draft, writing-review and editing.

567

#### 568 **Conflict of Interest Statement**

569 J.M.W. is a paid advisor to and holds equity in Scout Bio and Passage Bio; he holds equity in  
570 Surmount Bio; he also has sponsored research agreements with Albamunity, Amicus  
571 Therapeutics, Biogen, Elaaj Bio, FA212, Janssen, Moderna, Passage Bio, Regeneron, Scout Bio,  
572 Surmount Bio, and Ultragenyx, which are licensees of University of Pennsylvania technology.  
573 J.M.W., J.J.S, C.H., J.G., M.H., K.N., K.B.T., and S.J.C. are inventors on patents/patents filed by  
574 the University of Pennsylvania.

575

#### 576 **Data Availability Statement**

577 All datasets presented in this study are included in the article/supporting information.

578

#### 579 **List of Supplementary Materials**

580 Figures S1-S6

581

582

583

584

## 585 **References**

- 586 1. Chan KK, Tan TJC, Narayanan KK, Procko E. An engineered decoy receptor for SARS-CoV-2  
587 broadly binds protein S sequence variants. *Sci Adv.* 2021;7(8).
- 588 2. Glasgow A, Glasgow J, Limonta D, Solomon P, Lui I, Zhang Y, et al. Engineered ACE2 receptor  
589 traps potently neutralize SARS-CoV-2. *Proc Natl Acad Sci U S A.* 2020;117(45):28046-55.
- 590 3. Adam VS, Crosariol M, Kumar S, Ge MQ, Czack SE, Roy S, et al. Adeno-associated virus 9-  
591 mediated airway expression of antibody protects old and immunodeficient mice against influenza virus.  
592 *Clin Vaccine Immunol.* 2014;21(11):1528-33.
- 593 4. Laursen NS, Friesen RHE, Zhu X, Jongeneelen M, Blokland S, Vermond J, et al. Universal  
594 protection against influenza infection by a multidomain antibody to influenza hemagglutinin. *Science.*  
595 2018;362(6414):598-602.
- 596 5. Limberis MP, Adam VS, Wong G, Gren J, Kobasa D, Ross TM, et al. Intranasal antibody gene  
597 transfer in mice and ferrets elicits broad protection against pandemic influenza. *Sci Transl Med.*  
598 2013;5(187):187ra72.
- 599 6. Limberis MP, Racine T, Kobasa D, Li Y, Gao GF, Kobinger G, et al. Vectored expression of the  
600 broadly neutralizing antibody FI6 in mouse airway provides partial protection against a new avian  
601 influenza A virus, H7N9. *Clin Vaccine Immunol.* 2013;20(12):1836-7.
- 602 7. Angelini A, Chen TF, de Picciotto S, Yang NJ, Tzeng A, Santos MS, et al. Protein Engineering and  
603 Selection Using Yeast Surface Display. *Methods Mol Biol.* 2015;1319:3-36.
- 604 8. Chan KK, Dorosky D, Sharma P, Abbasi SA, Dye JM, Kranz DM, et al. Engineering human ACE2 to  
605 optimize binding to the spike protein of SARS coronavirus 2. *Science.* 2020;369(6508):1261-5.
- 606 9. Aguinaldo AM, Arnold FH. Staggered extension process (StEP) in vitro recombination. *Methods*  
607 *Mol Biol.* 2003;231:105-10.
- 608 10. Eckert-Boulet N, Pedersen ML, Krogh BO, Lisby M. Optimization of ordered plasmid assembly by  
609 gap repair in *Saccharomyces cerevisiae*. *Yeast.* 2012;29(8):323-34.
- 610 11. Boder ET, Midelfort KS, Wittrup KD. Directed evolution of antibody fragments with monovalent  
611 femtomolar antigen-binding affinity. *Proc Natl Acad Sci U S A.* 2000;97(20):10701-5.
- 612 12. Guy JL, Jackson RM, Jensen HA, Hooper NM, Turner AJ. Identification of critical active-site  
613 residues in angiotensin-converting enzyme-2 (ACE2) by site-directed mutagenesis. *FEBS J.*  
614 2005;272(14):3512-20.
- 615 13. Starr TN, Greaney AJ, Addetia A, Hannon WW, Choudhary MC, Dingens AS, et al. Prospective  
616 mapping of viral mutations that escape antibodies used to treat COVID-19. *Science.*  
617 2021;371(6531):850-4.
- 618 14. Thomson EC, Rosen LE, Shepherd JG, Spreafico R, da Silva Filipe A, Wojcechowskyj JA, et al.  
619 Circulating SARS-CoV-2 spike N439K variants maintain fitness while evading antibody-mediated  
620 immunity. *Cell.* 2021;184(5):1171-87 e20.
- 621 15. Wang P, Nair MS, Liu L, Iketani S, Luo Y, Guo Y, et al. Antibody Resistance of SARS-CoV-2 Variants  
622 B.1.351 and B.1.1.7. *Nature.* 2021.
- 623 16. Oude Munnink BB, Sikkema RS, Nieuwenhuijse DF, Molenaar RJ, Munger E, Molenkamp R, et al.  
624 Transmission of SARS-CoV-2 on mink farms between humans and mink and back to humans. *Science.*  
625 2021;371(6525):172-7.
- 626 17. Menachery VD, Yount BL, Jr., Sims AC, Debbink K, Agnihothram SS, Gralinski LE, et al. SARS-like  
627 WIV1-CoV poised for human emergence. *Proc Natl Acad Sci U S A.* 2016;113(11):3048-53.
- 628 18. Weissman D, Alameh MG, de Silva T, Collini P, Hornsby H, Brown R, et al. D614G Spike Mutation  
629 Increases SARS CoV-2 Susceptibility to Neutralization. *Cell Host Microbe.* 2021;29(1):23-31 e4.

- 630 19. Yurkovetskiy L, Wang X, Pascal KE, Tomkins-Tinch C, Nyalile TP, Wang Y, et al. Structural and  
631 Functional Analysis of the D614G SARS-CoV-2 Spike Protein Variant. *Cell*. 2020;183(3):739-51 e8.
- 632 20. Winkler ES, Bailey AL, Kafai NM, Nair S, McCune BT, Yu J, et al. SARS-CoV-2 infection of human  
633 ACE2-transgenic mice causes severe lung inflammation and impaired function. *Nature Immunology*.  
634 2020;21(11):1327-35.
- 635 21. Zheng J, Wong L-YR, Li K, Verma AK, Ortiz ME, Wohlford-Lenane C, et al. COVID-19 treatments  
636 and pathogenesis including anosmia in K18-hACE2 mice. *Nature*. 2021;589(7843):603-7.
- 637 22. Yinda CK, Port JR, Bushmaker T, Offei Owusu I, Purushotham JN, Avanzato VA, et al. K18-hACE2  
638 mice develop respiratory disease resembling severe COVID-19. *PLOS Pathogens*. 2021;17(1):e1009195.
- 639 23. Adachi K, Enoki T, Kawano Y, Veraz M, Nakai H. Drawing a high-resolution functional map of  
640 adeno-associated virus capsid by massively parallel sequencing. *Nat Commun*. 2014;5:3075.
- 641 24. Kemp SA, Collier DA, Datir RP, Ferreira I, Gayed S, Jahun A, et al. SARS-CoV-2 evolution during  
642 treatment of chronic infection. *Nature*. 2021.
- 643 25. Ozono S, Zhang Y, Ode H, Sano K, Tan TS, Imai K, et al. SARS-CoV-2 D614G spike mutation  
644 increases entry efficiency with enhanced ACE2-binding affinity. *Nat Commun*. 2021;12(1):848.
- 645 26. Zhou D, Dejnirattisai W, Supasa P, Liu C, Mentzer AJ, Ginn HM, et al. Evidence of escape of SARS-  
646 CoV-2 variant B.1.351 from natural and vaccine-induced sera. *Cell*. 2021.
- 647 27. Zhang H, Rostami MR, Leopold PL, Mezey JG, O'Beirne SL, Strulovici-Barel Y, et al. Expression of  
648 the SARS-CoV-2 ACE2 Receptor in the Human Airway Epithelium. *Am J Respir Crit Care Med*.  
649 2020;202(2):219-29.
- 650 28. Bunyavanich S, Do A, Vicencio A. Nasal Gene Expression of Angiotensin-Converting Enzyme 2 in  
651 Children and Adults. *JAMA*. 2020;323(23):2427-9.
- 652 29. Ramanathan M, Ferguson ID, Miao W, Khavari PA. SARS-CoV-2 B.1.1.7 and B.1.351 Spike  
653 variants bind human ACE2 with increased affinity. *bioRxiv*. 2021.
- 654 30. Joaquín Cáceres C, Cardenas-Garcia S, Carnaccini S, Seibert B, Rajao DS, Wang J, et al. Efficacy of  
655 GC-376 against SARS-CoV-2 virus infection in the K18 hACE2 transgenic mouse model. *bioRxiv*.  
656 2021:2021.01.27.428428.
- 657 31. Rosenfeld R, Noy-Porat T, Mechaly A, Makdasi E, Levy Y, Alcalay R, et al. Post-exposure  
658 protection of SARS-CoV-2 lethal infected K18-hACE2 transgenic mice by neutralizing human monoclonal  
659 antibody. *Nature Communications*. 2021;12(1):944.
- 660 32. Limberis MP, Wilson JM. Adeno-associated virus serotype 9 vectors transduce murine alveolar  
661 and nasal epithelia and can be readministered. *Proc Natl Acad Sci U S A*. 2006;103(35):12993-8.
- 662 33. Latinne A, Hu B, Olival KJ, Zhu G, Zhang L, Li H, et al. Origin and cross-species transmission of bat  
663 coronaviruses in China. *Nat Commun*. 2020;11(1):4235.
- 664 34. Gietz RD, Schiestl RH. Large-scale high-efficiency yeast transformation using the LiAc/SS carrier  
665 DNA/PEG method. *Nat Protoc*. 2007;2(1):38-41.
- 666 35. Chao G, Lau WL, Hackel BJ, Sazinsky SL, Lippow SM, Wittrup KD. Isolating and engineering  
667 human antibodies using yeast surface display. *Nat Protoc*. 2006;1(2):755-68.
- 668 36. Lock M, Alvira M, Vandenberghe LH, Samanta A, Toelen J, Debyser Z, et al. Rapid, simple, and  
669 versatile manufacturing of recombinant adeno-associated viral vectors at scale. *Hum Gene Ther*.  
670 2010;21(10):1259-71.
- 671 37. Lock M, Alvira MR, Chen SJ, Wilson JM. Absolute determination of single-stranded and self-  
672 complementary adeno-associated viral vector genome titers by droplet digital PCR. *Hum Gene Ther*  
673 *Methods*. 2014;25(2):115-25.
- 674 38. Kaulbach HC, White MV, Igarashi Y, Hahn BK, Kaliner MA. Estimation of nasal epithelial lining  
675 fluid using urea as a marker. *J Allergy Clin Immunol*. 1993;92(3):457-65.
- 676 39. Baum A, Ajithdoss D, Copin R, Zhou A, Lanza K, Negron N, et al. REGN-COV2 antibodies prevent  
677 and treat SARS-CoV-2 infection in rhesus macaques and hamsters. *Science*. 2020;370(6520):1110-5.

678 40. Xu C, Wang Y, Liu C, Zhang C, Han W, Hong X, et al. Conformational dynamics of SARS-CoV-2  
679 trimeric spike glycoprotein in complex with receptor ACE2 revealed by cryo-EM. *Sci Adv.* 2021;7(1).

680

681

682

683

684

685

686

687

688

689

690

691

692

693

694

695

696

697

698 **Figure Captions**

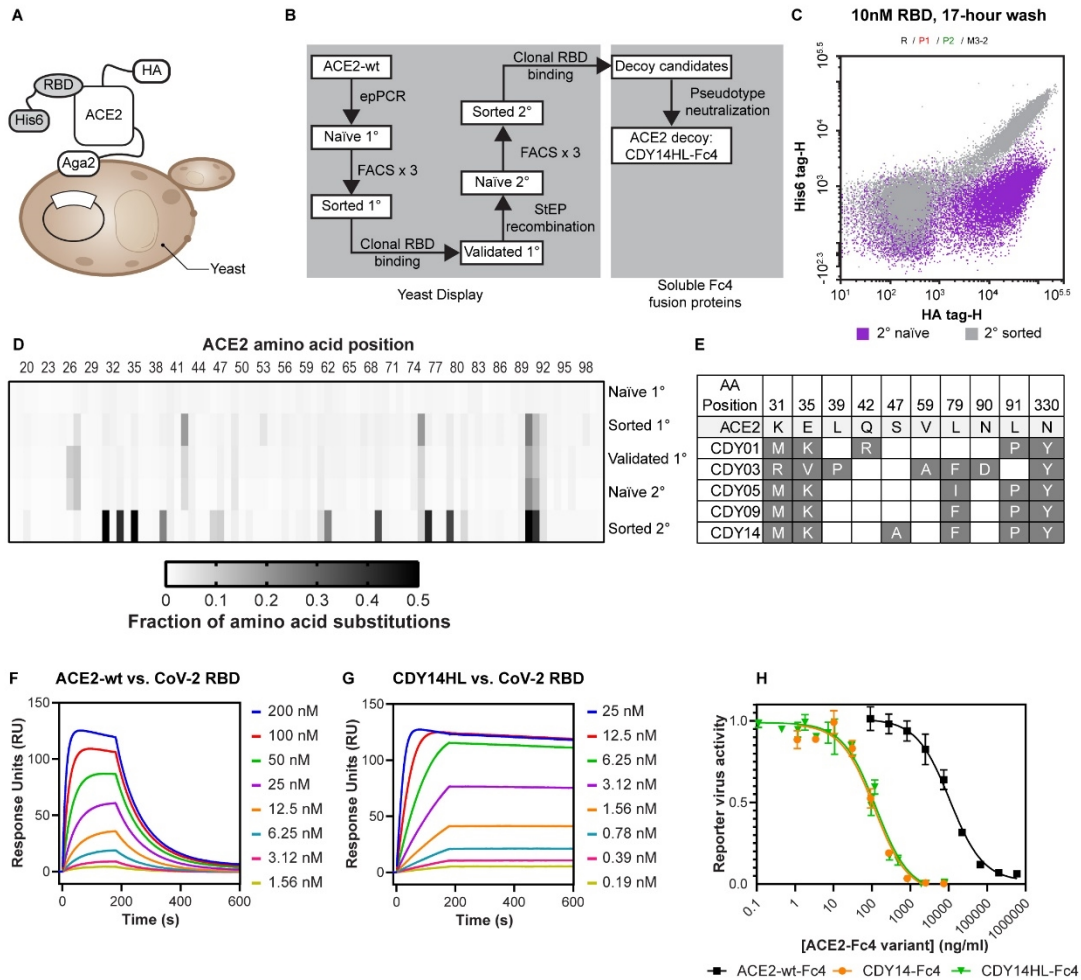

699

700 **Fig. 1. ACE2 Decoy Receptor Engineering.** **A.** Yeast display (YD) system **B.** Decoy affinity  
 701 maturation and candidate selection process. **C.** Flow cytometry analysis of the naïve (purple)  
 702 and sorted populations (gray) from the secondary YD library. **D.** NGS analysis of plasmid  
 703 populations recovered from rounds of YD. **E.** Mutations accumulated in the top five decoy-Fc4  
 704 candidates. **F and G.** SPR binding analysis for CoV-2 RBD injected over surface-immobilized  
 705 ACE2-wt (F) or CDY14HL (G). **H.** Wuhan CoV-2-Pseudotyped lentiviral reporter neutralization  
 706 assay of ACE2-wt-Fc4, CDY14-Fc4, and CDY14HL-Fc4. Data for at least three independent  
 707 measurements are presented as average  $\pm$  standard deviation.



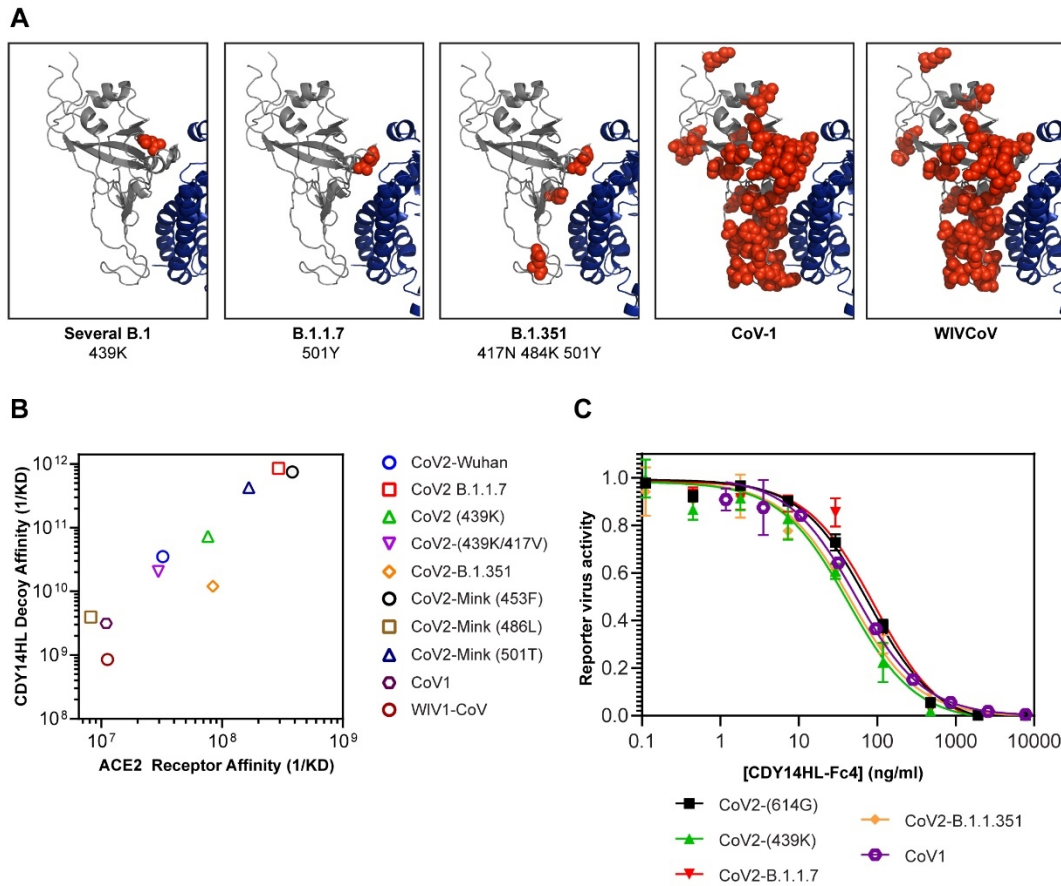

708

709 **Fig. 2 ACE2 Decoy Binding and Neutralization Across Diverse CoVs.** **A.** Structural models  
 710 (7DF4.pdb (40)) of Wuhan CoV-2 RBD (gray) bound to human ACE2 (blue) RBD residues that  
 711 distinguish each variant (listed below each panel) from the Wuhan CoV-2 RBD are shown in red  
 712 spheres. **B.** SPR measurements: ACE2-wt-Fc4 or CDY14HL-Fc4 binding to various purified  
 713 recombinant RBD proteins. **C.** We used reporter lentiviruses pseudotyped with CoV spike  
 714 proteins from five isolates to determine the neutralizing potencies of CDY14HL-Fc4. Reporter  
 715 virus activity data are presented as mean  $\pm$  standard deviation for at least three replicate  
 716 titrations.

717



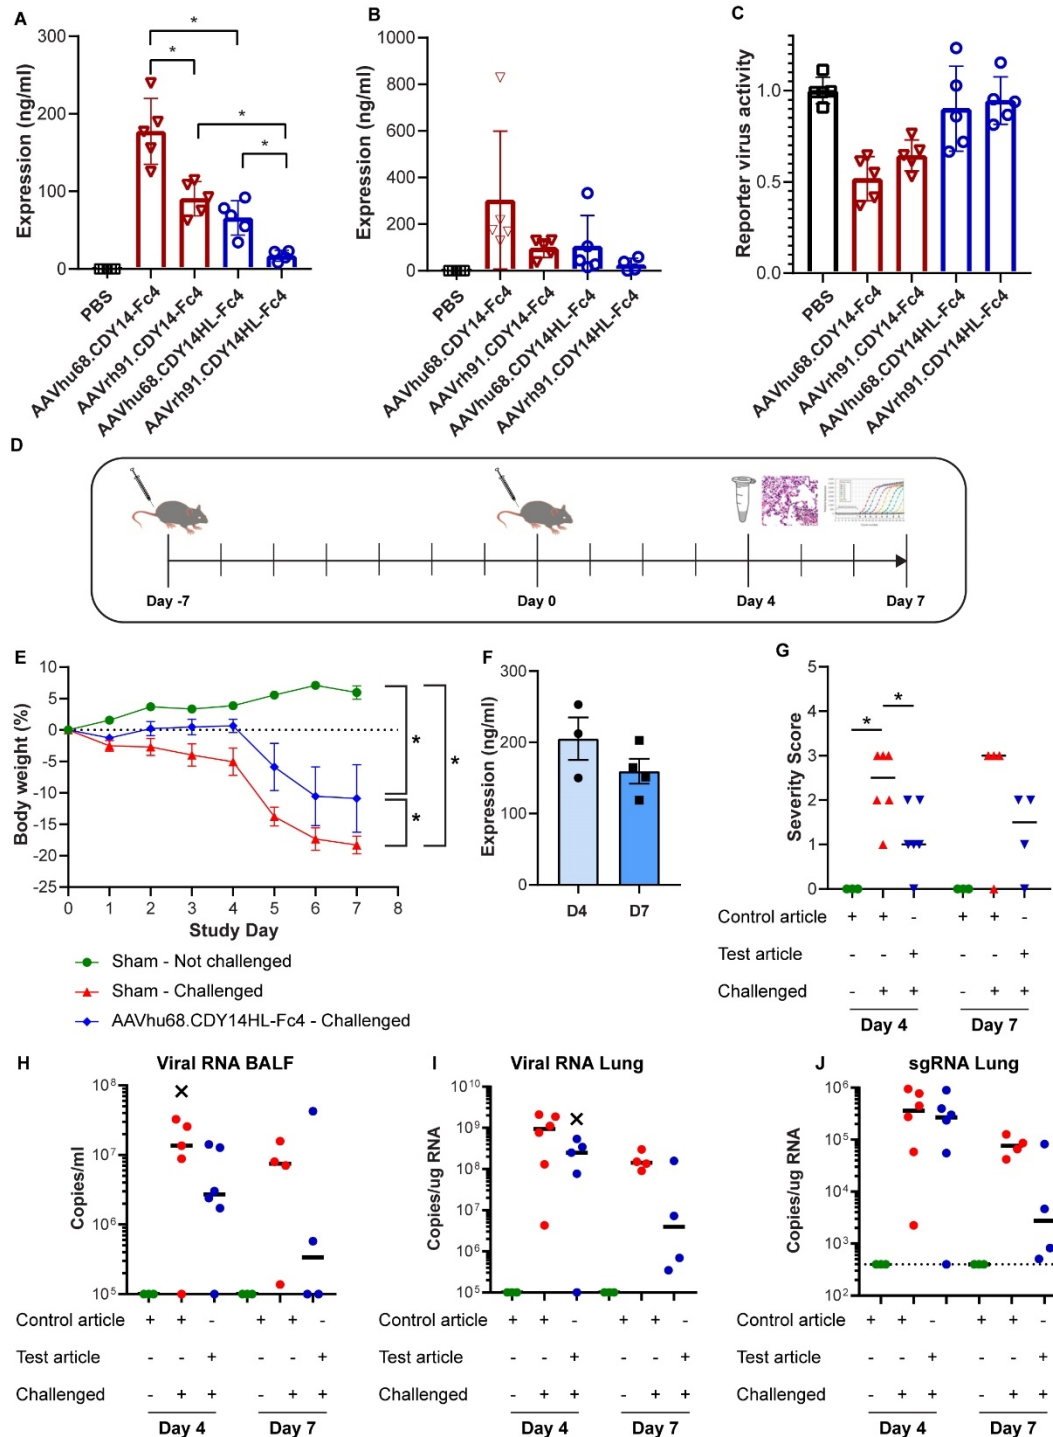

718

719 **Figure 3. Protection in the human ACE2 transgenic mouse model.** BAL from vector-treated

720 animals analyzed for: **A.** decoy protein by MS; **B.** SARS-CoV-2 spike ELISA; **C.** neutralization

721 of SARS-CoV-2 pseudotyped lentivirus. **D.** Challenge study design. **E.** Weight loss in the

722 animals that were sustained for 7 days; one animal in the vehicle and vector treated groups

723 required euthanasia. **F.** MS assay of expression in ASF (corrected for BAL dilution). **G.**  
724 Pulmonary inflammation histopathology scores of tissues harvested at days 4 and 7. **H.** Viral  
725 RNA in BAL. **I.** Viral RNA in lung. **J.** Sub-genomic RNA in lung. Outliers are indicated with X.

726

727

728

729

730

731

732

733

734

735

736

737

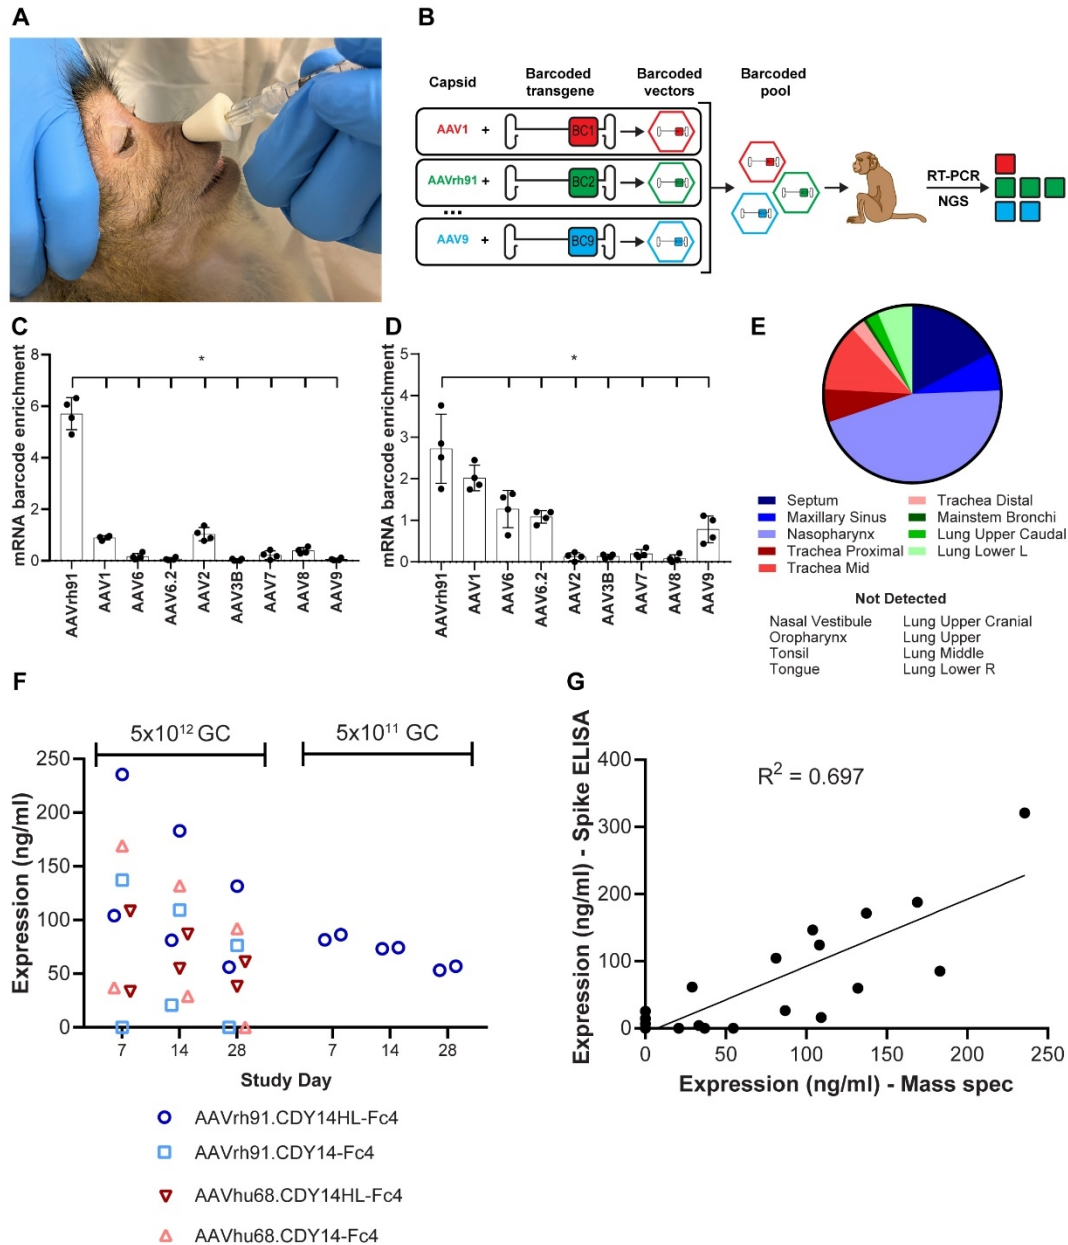

738  
 739 **Figure 4. AAV-Delivered Decoy Expression in the Airway of NHP.** **A.** NHP vector delivery  
 740 via MAD Nasal™. **B.** Pooled capsid comparison using mRNA barcoding. mRNA barcode  
 741 enrichment scores (average across 4 barcodes  $\pm$  SD) in **(C)** nasopharynx and **(D)** septum. **E.**  
 742 AAVrh91 transduction profile in airway barcode study. **F.** MS assay of expression in ASF  
 743 (corrected for BAL dilution) for NHPs (2/group) dosed with ACE2 decoy vector. **G.** Correlation  
 744 between decoy protein by MS and spike binding by ELISA. Data includes d7 and d14 samples

745 from (F) plus NLF of 3 naïve macaques. We excluded one naïve animal from ELISA analysis  
746 because of background binding presumably due to a prior coronavirus infection.

747

748

749

750

751

752

753

754

755

756

757

758

759

760

761

762

763

764

765

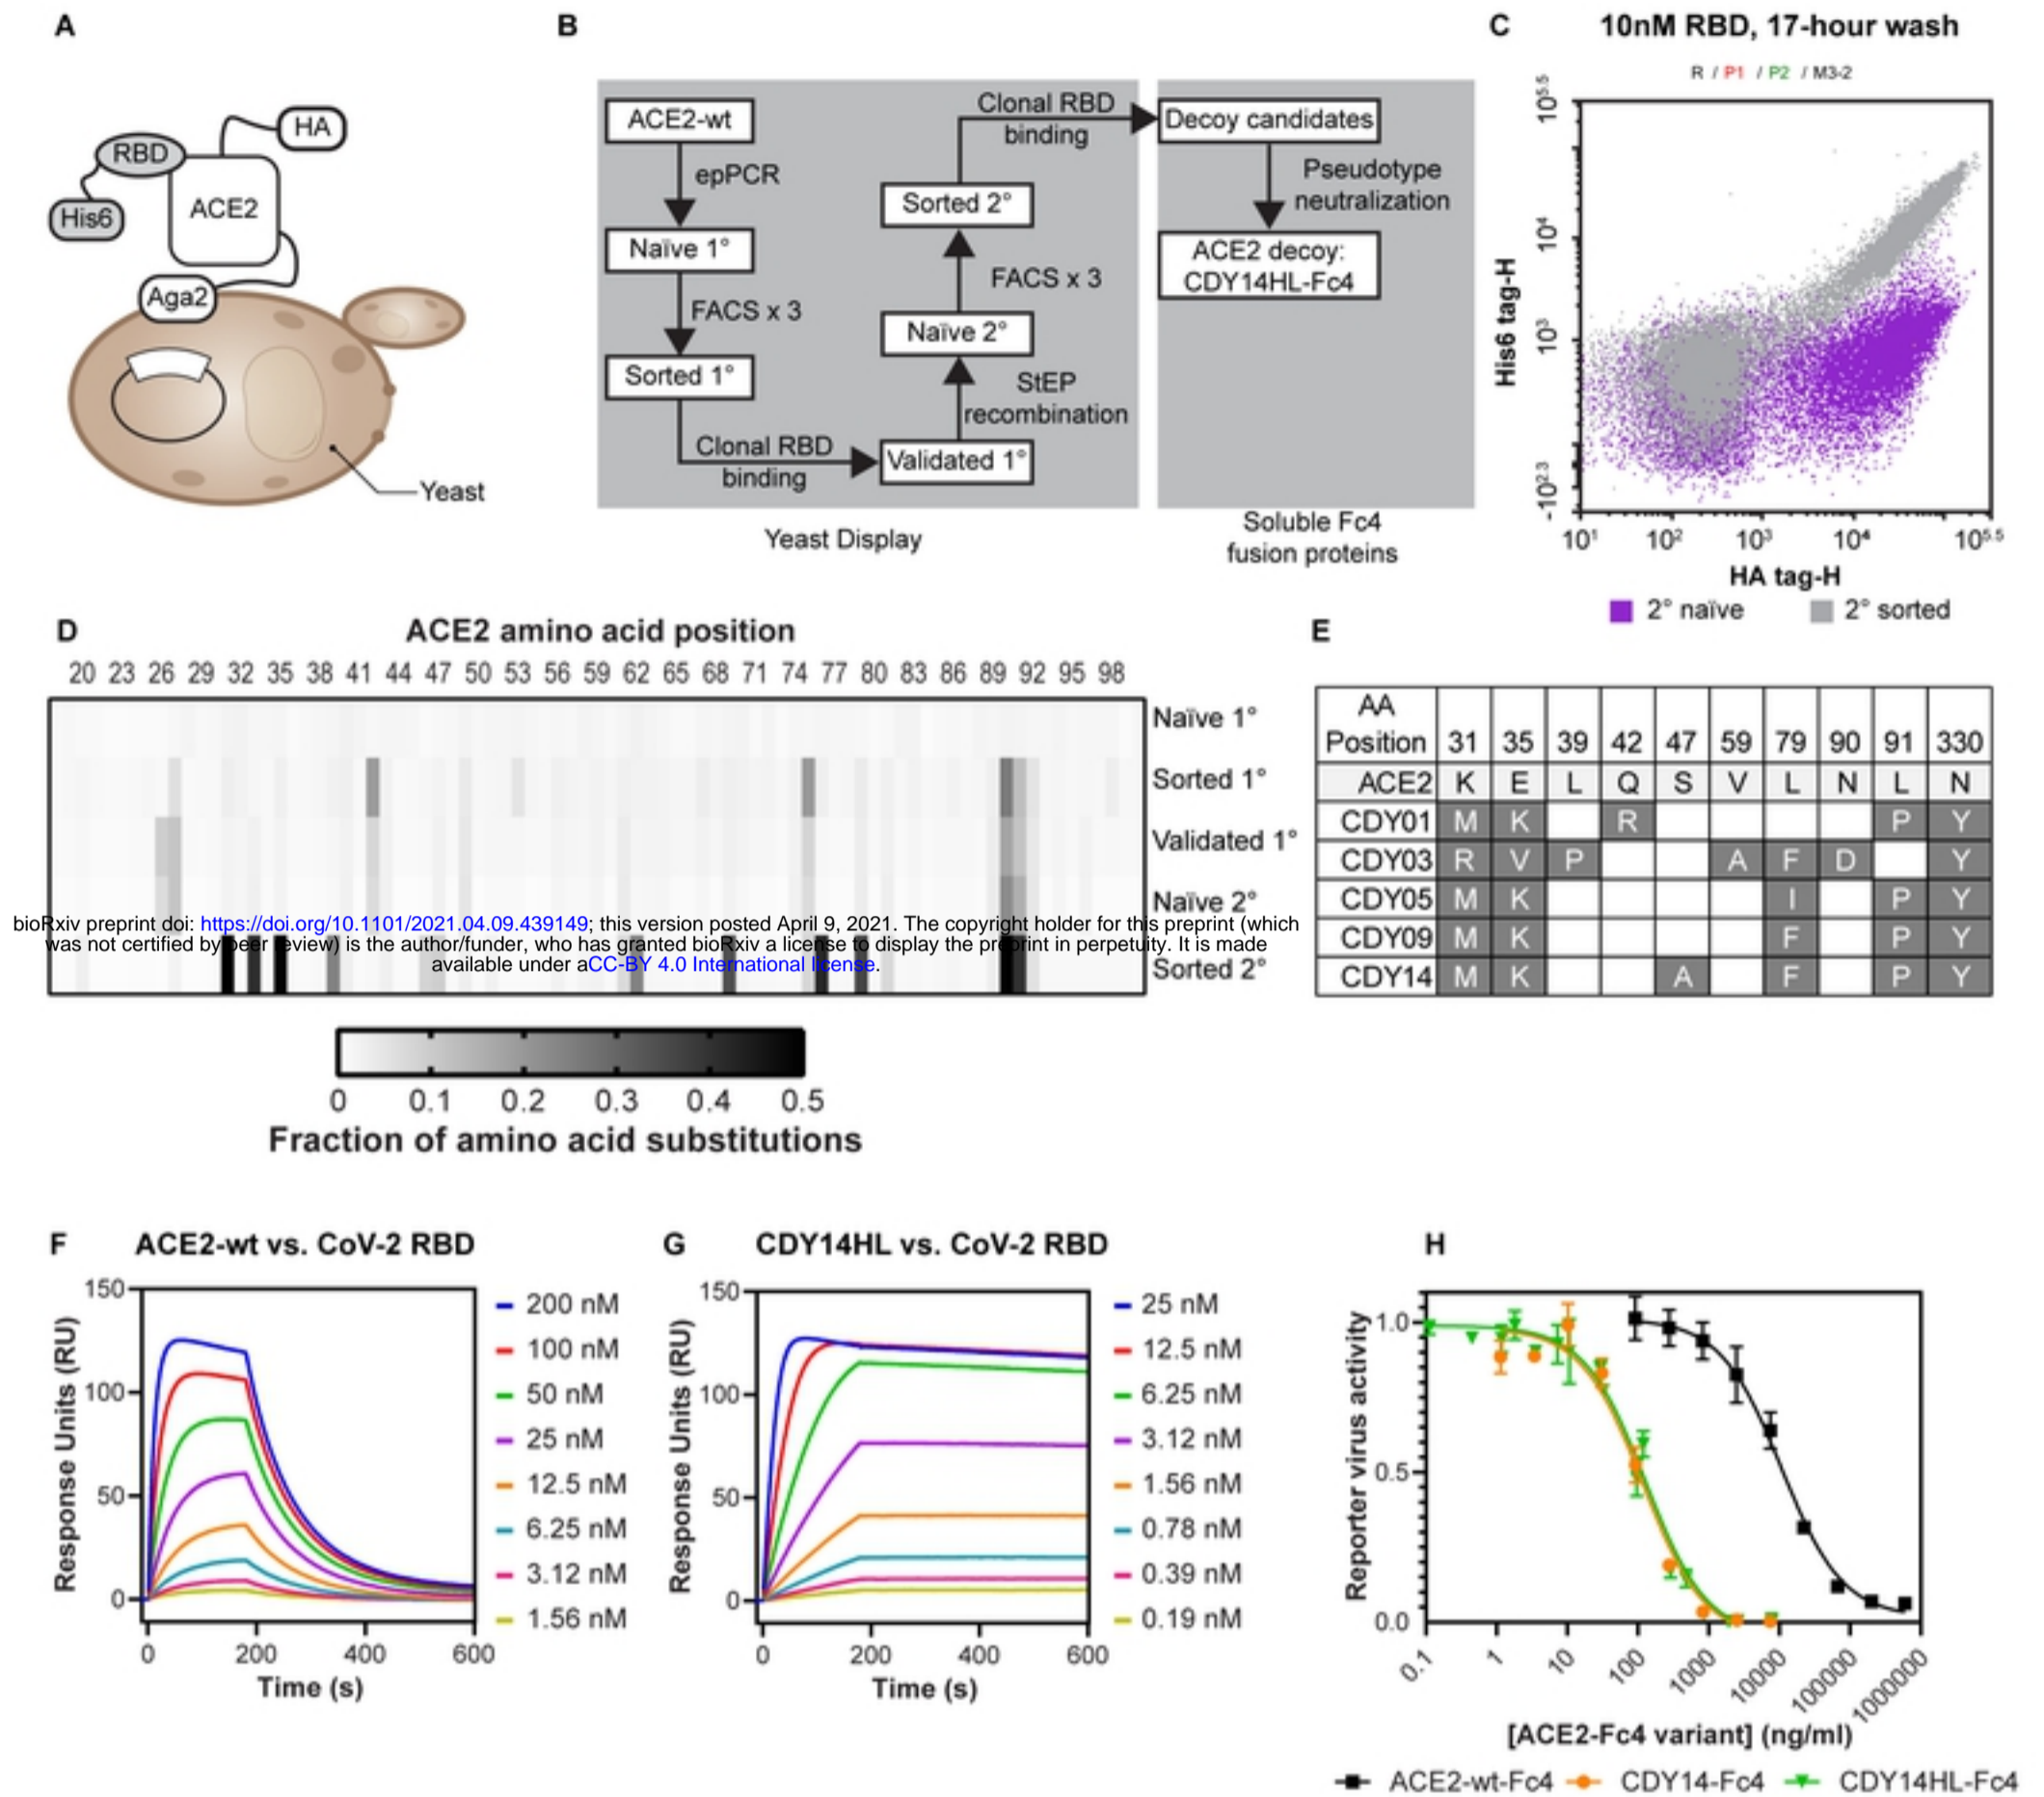

Figure 1



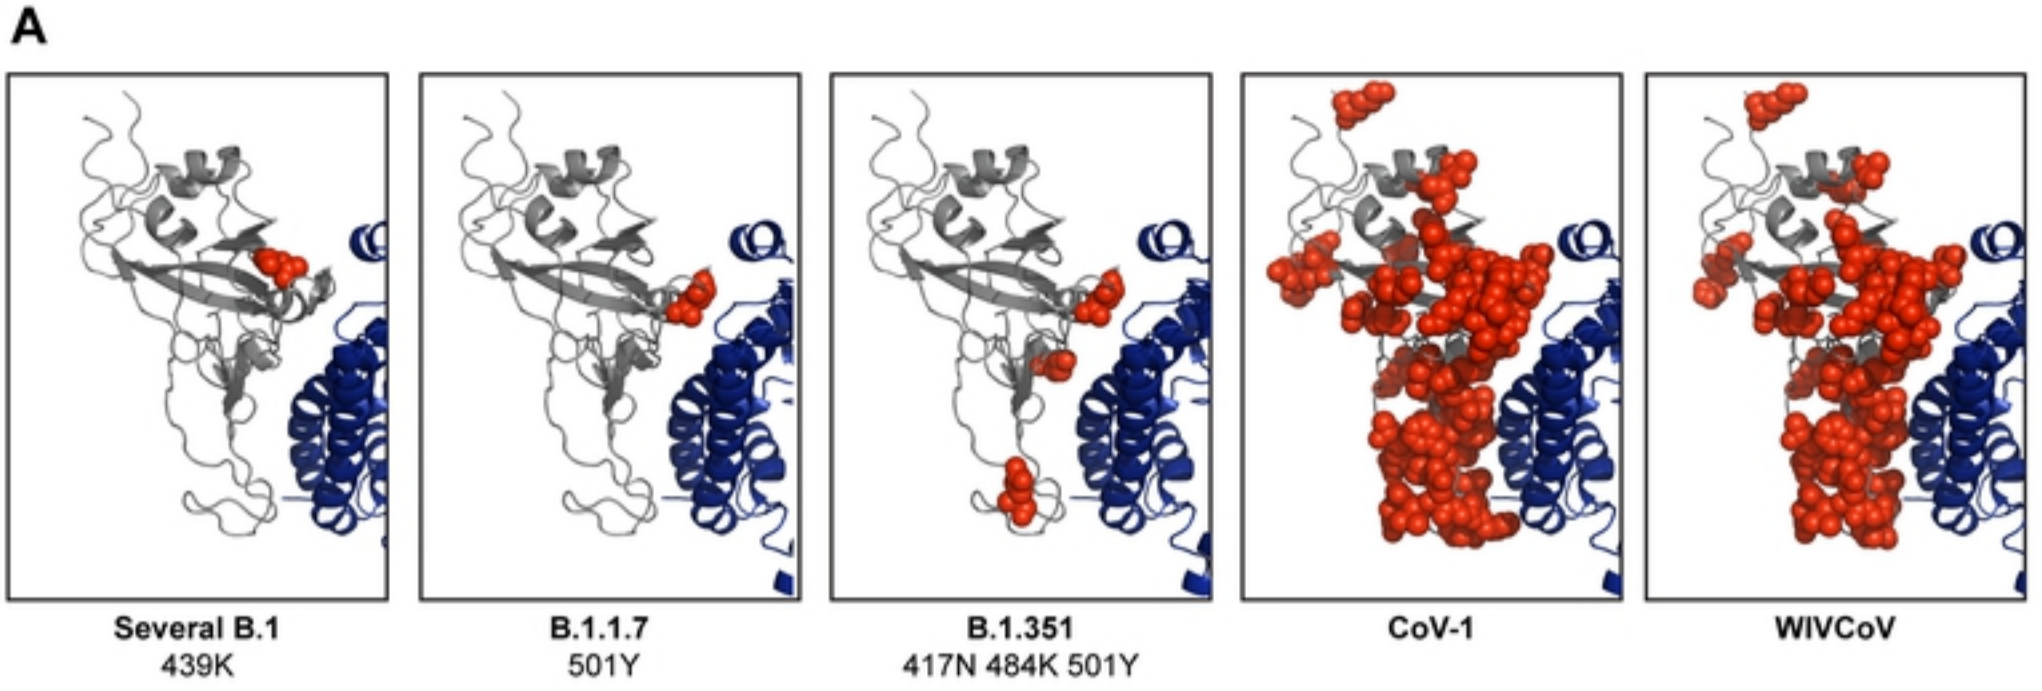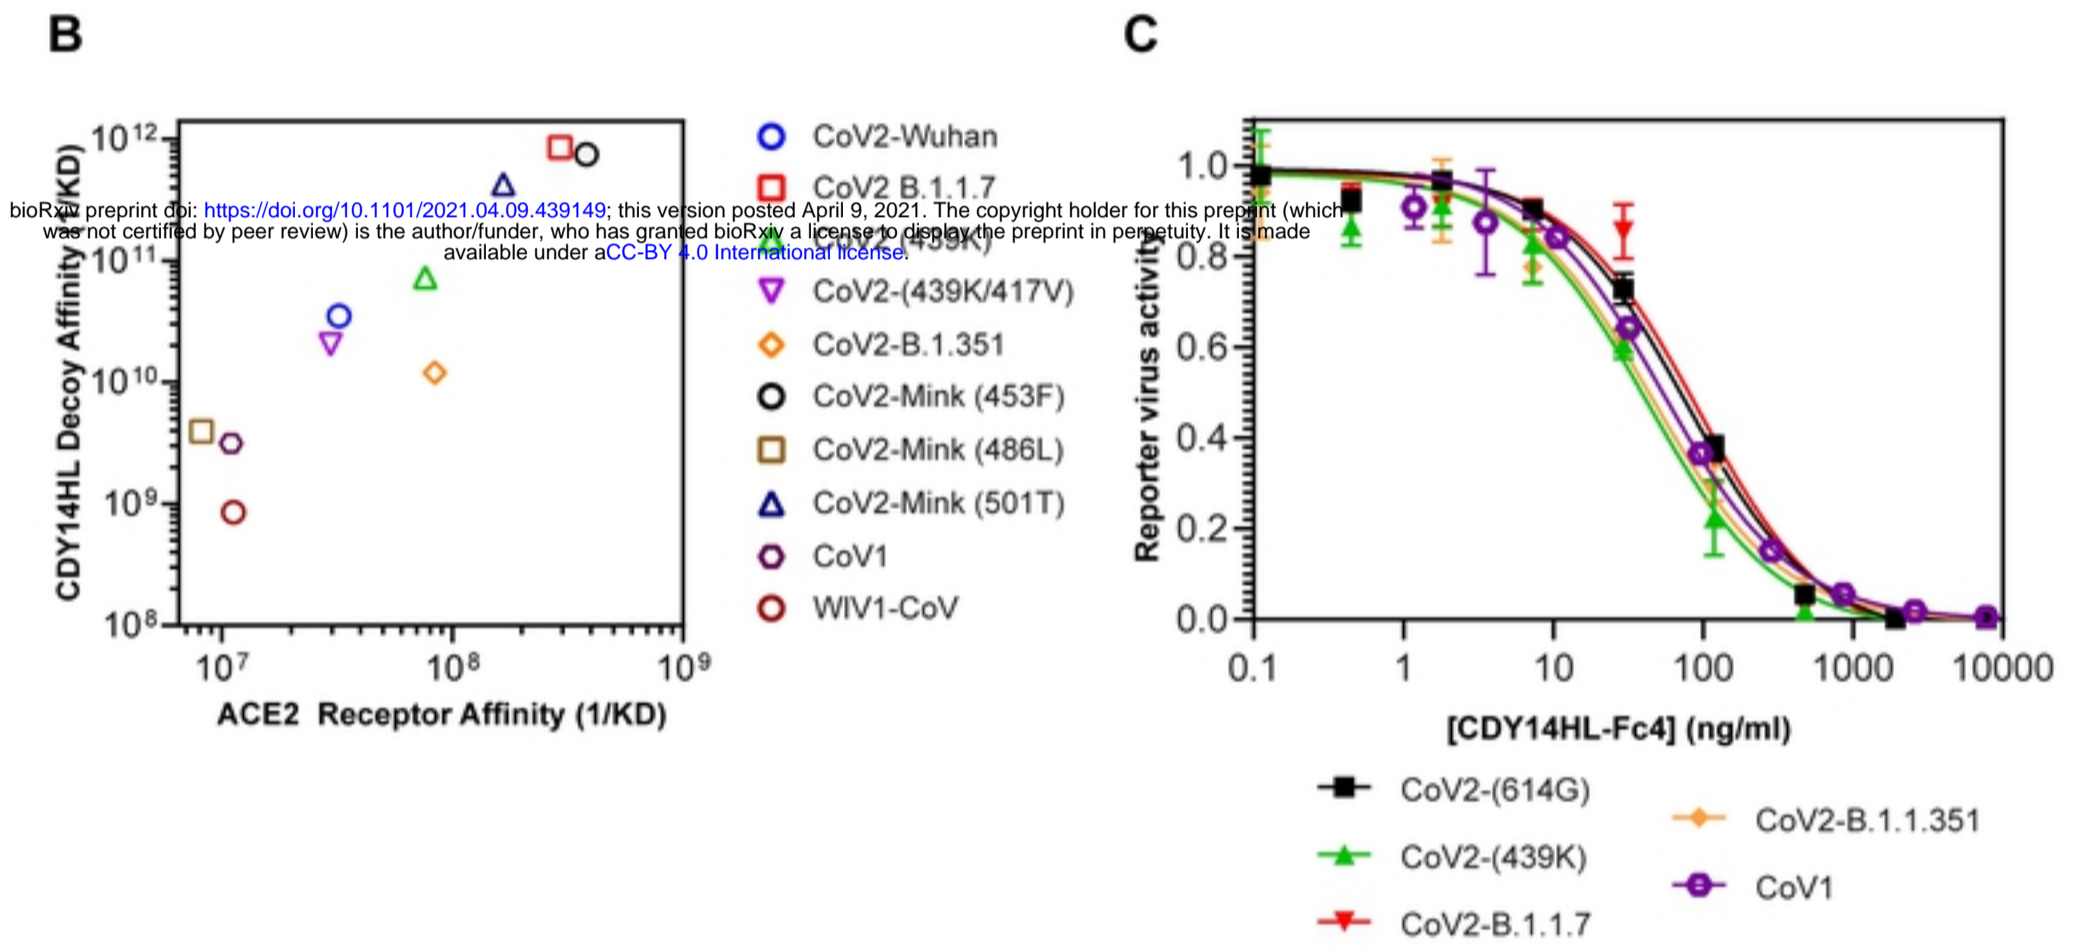

Figure 2

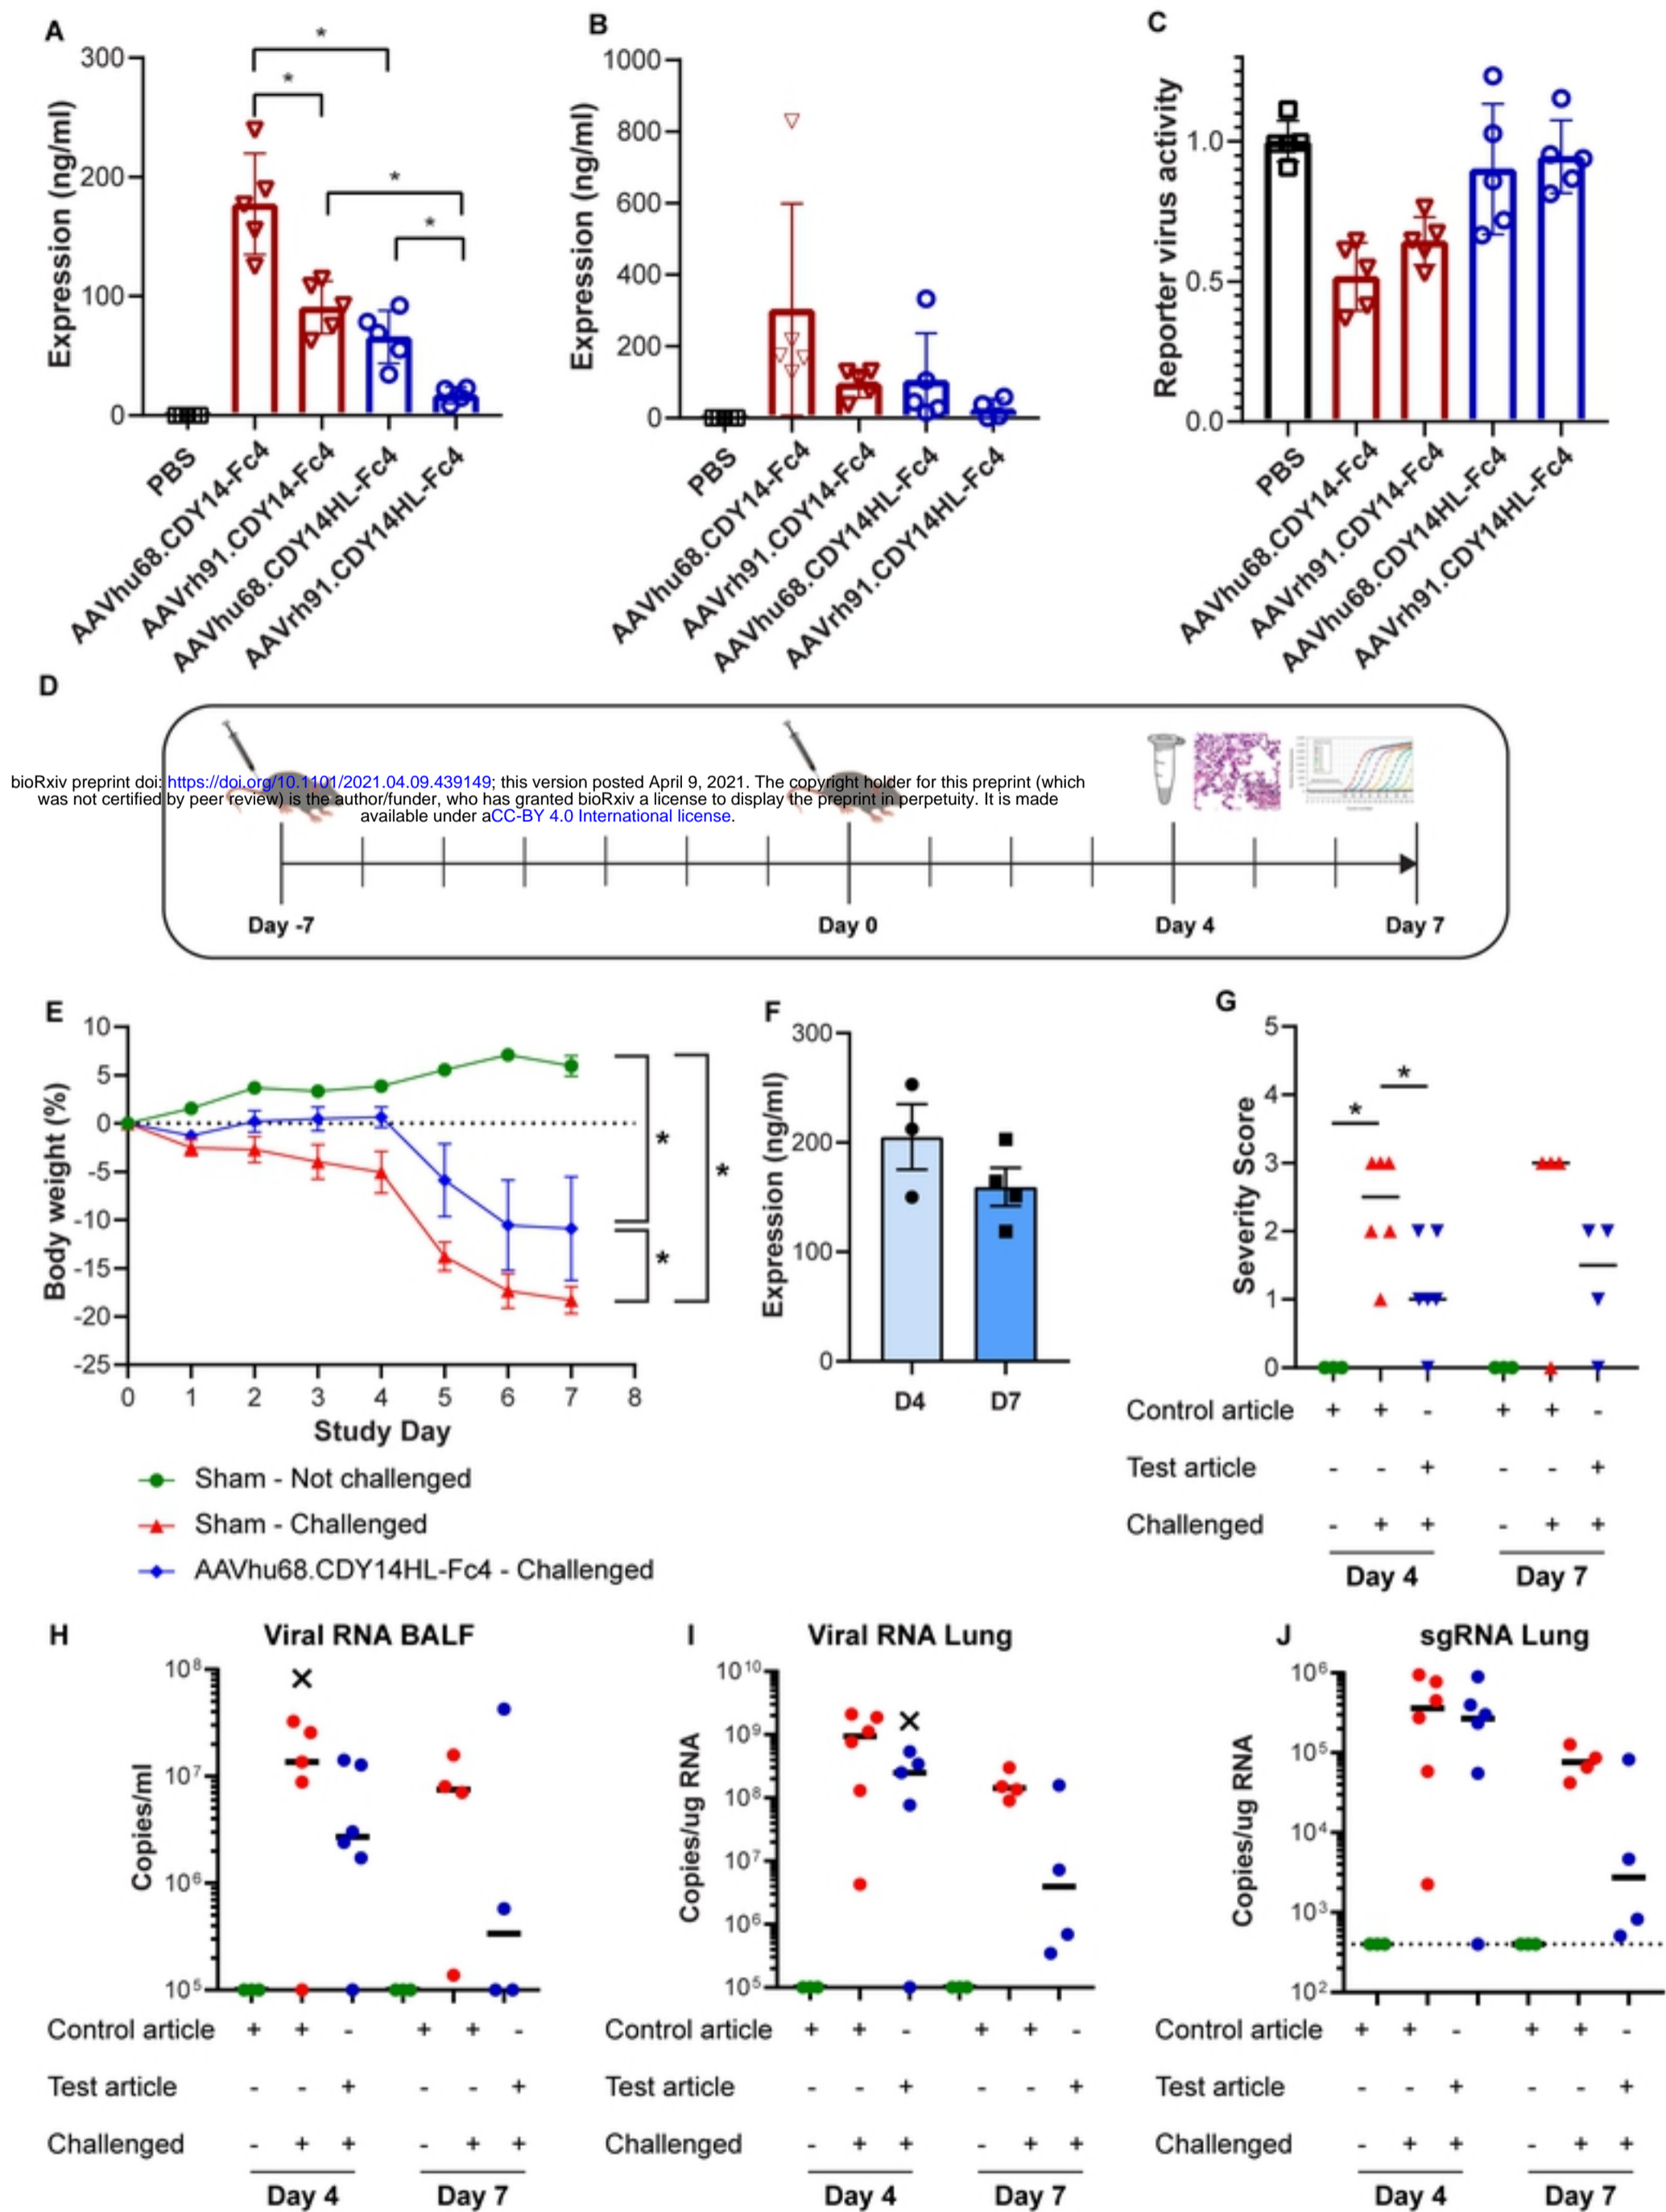

Figure 3



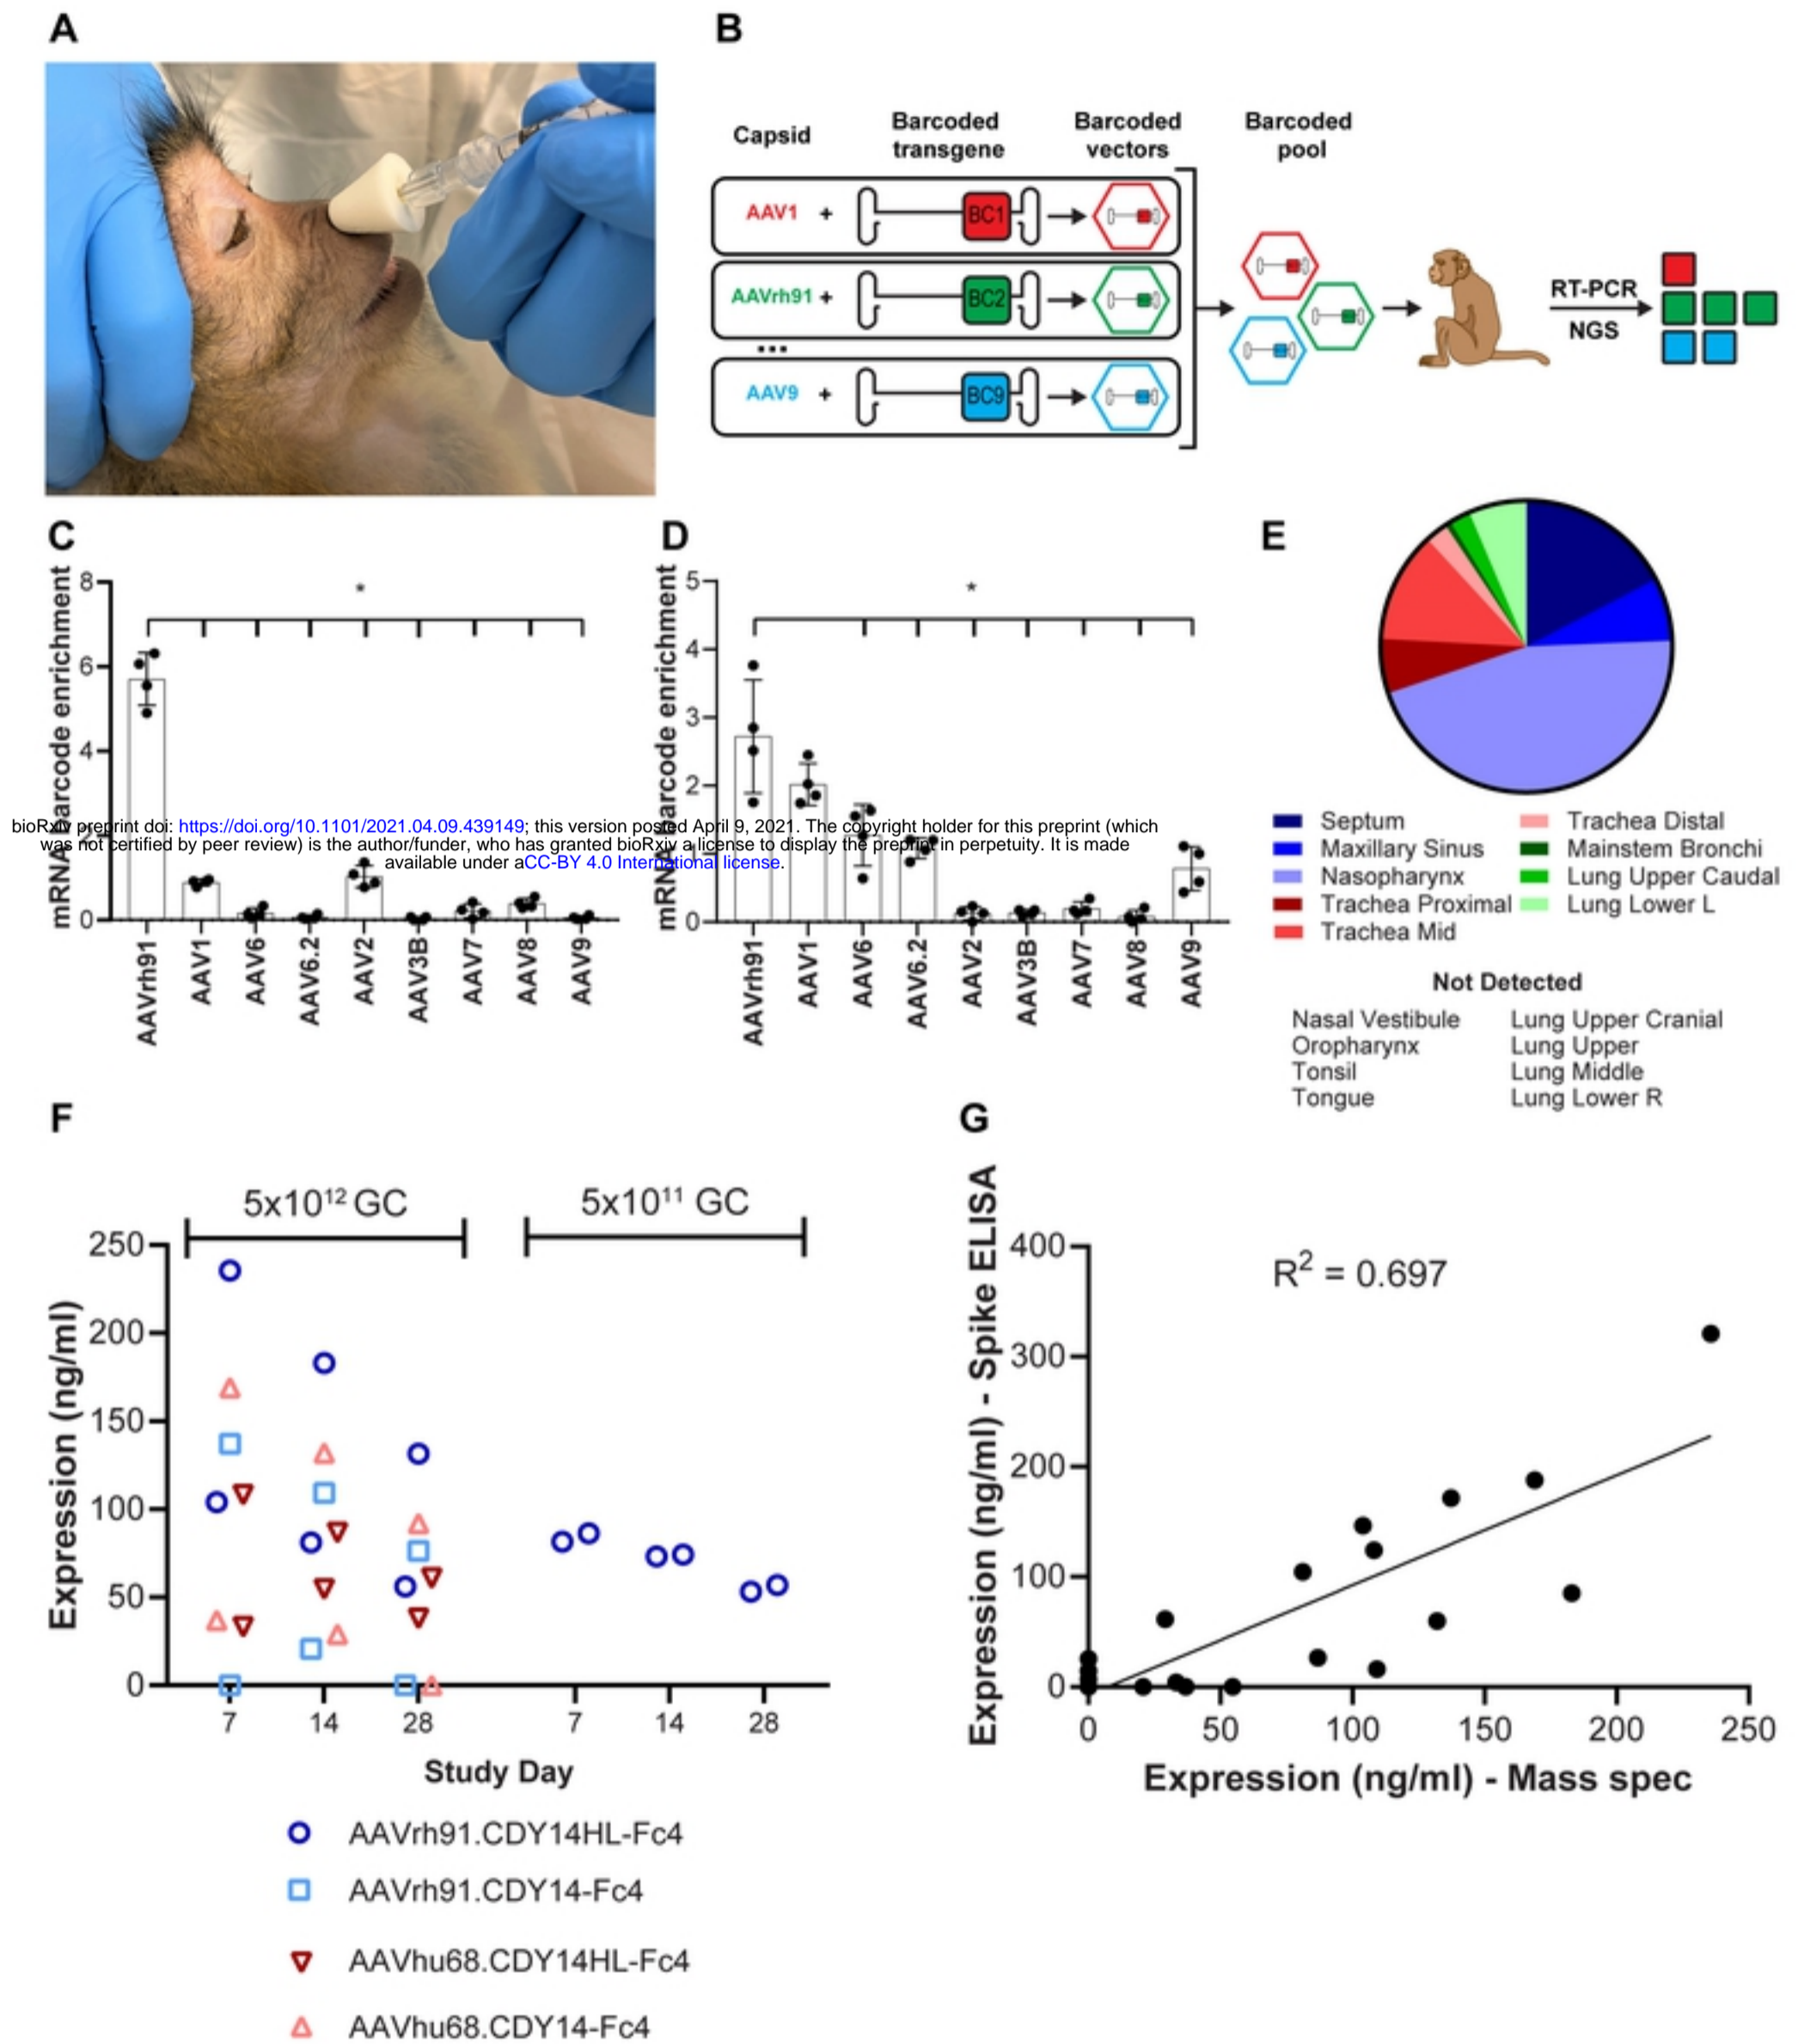

Figure 4
